# Supplementary material for: IL6-174 G>C Polymorphism (rs1800795) Association with Late Effects of Low Dose Radiation Exposure in the Portuguese Tinea Capitis Cohort
Source: PLoS One. 2016 Sep 23;11(9):e0163474. doi: 10.1371/journal.pone.0163474 (PMC5035001; doi:10.1371/journal.pone.0163474)
Supplement: S1 File — (XLSX) [file pone.0163474.s001.xlsx]

## Sheet: TC and BCC study
Participant number	Gender	Age	Thyroid carcinoma	Basal cell carcinoma	IL6-174 genotype
6	Male	57	No	No	CC
7	Male	64	No	No	CC
10	Male	57	No	No	GC
11	Male	58	No	No	GG
15	Male	52	No	No	GG
24	Male	59	No	No	GG
28	Male	64	No	No	GC
30	Male	55	No	No	CC
38	Female	59	No	No	GG
43	Male	59	No	No	GG
46	Male	65	No	No	GG
55	Female	55	No	No	GG
58	Female	63	No	Yes	GG
64	Male	58	No	Yes	CC
69	Male	58	No	No	GC
70	Male	62	No	No	GG
74	Male	55	Yes	No	GG
75	Male	57	No	No	GG
86	Male	57	No	No	GG
89	Male	56	No	No	GC
90	Male	51	No	No	GC
93	Male	59	No	No	CC
98	Male	69	No	No	GC
108	Male	59	No	No	GC
110	Male	61	No	No	GC
119	Male	58	No	No	GG
129	Female	68	No	No	GG
141	Female	50	No	No	GG
147	Female	62	No	No	CC
149	Female	58	No	Yes	GC
163	Male	59	No	No	GC
171	Male	57	No	No	GG
173	Male	52	No	No	GG
174	Male	51	No	No	GC
179	Male	58	No	No	GC
181	Male	66	No	No	GC
186	Male	58	No	No	GG
187	Male	67	No	No	GG
201	Female	65	No	No	GC
225	Male	53	No	No	GG
230	Female	62	No	No	CC
231	Female	67	No	No	GG
232	Male	60	No	No	GG
234	Male	60	No	No	GG
259	Male	57	No	No	GC
267	Male	60	No	No	GG
270	Male	53	No	No	GC
275	Male	63	No	No	GC
276	Female	62	No	No	CC
278	Male	57	No	No	GG
280	Male	57	No	No	GC
284	Male	67	No	No	GG
285	Male	68	No	No	GG
287	Male	59	No	No	GC
288	Male	57	No	No	GG
295	Female	53	No	No	GG
300	Female	74	No	Yes	GC
305	Female	64	No	No	GC
310	Male	56	Yes	No	GG
313	Female	62	No	No	GC
332	Male	67	No	No	GC
335	Female	70	No	Yes	CC
338	Female	61	No	No	GG
339	Female	61	No	Yes	GC
340	Female	49	No	No	GG
344	Female	56	No	No	GC
348	Female	57	No	No	GC
349	Female	62	No	No	GC
350	Female	60	No	No	CC
352	Female	62	No	No	GG
355	Male	62	No	No	GG
360	Male	52	No	No	GC
361	Male	61	No	No	CC
362	Male	53	No	No	GC
366	Female	55	No	No	GC
374	Female	63	No	No	CC
375	Female	59	No	No	GC
377	Male	59	No	No	GC
378	Male	50	No	No	GC
380	Male	64	No	No	GG
381	Male	65	No	No	GC
386	Male	60	No	No	GG
387	Male	60	No	No	GG
391	Male	66	No	No	GC
402	Male	61	No	Yes	CC
408	Female	53	No	No	GC
412	Female	62	No	No	CC
416	Female	56	No	No	GC
420	Female	70	No	Yes	GC
421	Female	63	No	No	GC
426	Female	65	No	No	GC
432	Female	56	No	No	GC
442	Female	54	No	No	GC
443	Female	57	No	Yes	GG
446	Female	56	No	Yes	GC
449	Female	61	No	No	GC
452	Female	62	No	No	GG
453	Female	54	No	No	GG
457	Female	58	No	No	CC
458	Female	53	No	No	GG
459	Female	59	No	No	GC
460	Female	55	No	No	GC
468	Female	57	No	No	GG
473	Female	57	No	No	GG
474	Female	57	Yes	No	GG
481	Female	63	Yes	No	GC
485	Female	60	No	Yes	GC
487	Female	61	No	No	GC
495	Female	67	No	No	GG
496	Female	67	No	No	GG
498	Female	57	No	Yes	GG
502	Female	63	No	No	GC
504	Female	53	No	No	GC
510	Female	54	No	No	GG
526	Male	53	No	No	GG
528	Male	63	No	No	GC
529	Female	56	No	No	GG
540	Female	58	No	No	GG
542	Female	54	No	No	GC
543	Female	65	No	No	GC
544	Female	57	Yes	No	GC
546	Male	58	No	No	GC
547	Male	54	No	No	GC
548	Male	57	No	No	GC
554	Male	53	No	No	GG
564	Male	49	No	No	GC
570	Male	55	No	No	GC
586	Male	55	No	No	GG
590	Male	54	No	No	CC
595	Male	53	No	No	GC
599	Male	55	No	No	CC
609	Male	62	No	No	CC
614	Male	64	Yes	No	GC
615	Male	59	No	No	GG
637	Male	61	No	No	GC
640	Male	55	No	No	GC
642	Male	64	No	No	GC
644	Male	58	No	No	GG
656	Male	63	No	No	GC
673	Male	64	No	No	GG
678	Male	57	No	No	GC
686	Male	61	No	No	GC
691	Male	54	No	No	GG
702	Male	53	No	No	GC
704	Male	52	No	No	GG
706	Male	63	No	No	GG
711	Male	53	No	No	GG
713	Male	58	No	No	CC
715	Male	57	No	No	GG
716	Male	56	No	No	GG
722	Male	55	No	Yes	GG
725	Male	66	No	No	GG
726	Male	51	No	No	GC
733	Male	57	No	No	GC
734	Male	56	No	No	GC
736	Male	47	No	No	GG
746	Male	60	No	No	GG
753	Male	59	No	No	GG
770	Male	59	No	No	GG
772	Male	61	No	No	CC
787	Male	61	No	No	GG
789	Male	49	No	No	GG
798	Male	56	No	No	GG
804	Male	62	No	No	GC
818	Male	57	No	No	GG
827	Male	60	No	No	GG
836	Male	64	No	No	GG
863	Male	59	No	No	GG
868	Male	59	No	No	CC
870	Male	55	No	No	GG
876	Female	62	No	No	GG
879	Male	66	No	No	GC
880	Male	61	No	No	GC
886	Male	59	No	No	GC
888	Male	60	No	No	GC
893	Male	58	No	No	GC
896	Female	61	No	Yes	CC
898	Male	48	No	No	GG
909	Male	52	No	No	GC
911	Male	56	No	No	GC
912	Male	59	No	No	GC
917	Male	55	No	No	GC
923	Male	62	No	No	GG
926	Male	54	No	No	GG
937	Female	63	No	No	GC
939	Female	54	No	No	GC
947	Male	61	No	Yes	GC
951	Male	56	No	No	GC
959	Male	50	No	No	GG
961	Male	68	No	No	GC
962	Male	55	No	No	GG
964	Male	54	No	No	CC
977	Male	61	No	No	GC
980	Female	55	No	No	GG
990	Male	72	No	Yes	GC
991	Male	64	No	No	GG
997	Male	56	No	No	GG
998	Male	59	No	No	GC
1001	Male	54	No	No	GC
1007	Female	57	No	No	GC
1012	Female	65	No	No	GC
1014	Female	52	Yes	No	GG
1022	Female	59	No	No	GC
1025	Female	62	No	No	GG
1028	Male	62	No	No	GG
1033	Male	61	No	No	GG
1039	Female	51	No	No	CC
1040	Male	53	No	No	CC
1042	Female	55	No	No	GC
1044	Male	59	No	Yes	GC
1045	Female	60	No	No	GC
1046	Female	53	No	No	GC
1050	Female	58	No	Yes	GG
1051	Female	53	No	No	GG
1053	Female	63	No	No	GG
1055	Female	59	No	No	GC
1057	Female	56	No	No	GG
1060	Female	54	No	No	GG
1061	Female	61	No	No	GC
1070	Female	52	No	No	GC
1073	Female	67	No	No	CC
1074	Female	63	No	Yes	GC
1078	Male	62	No	No	GG
1082	Male	56	No	No	GG
1085	Female	59	No	No	GG
1086	Female	51	No	No	GG
1087	Female	57	No	Yes	CC
1092	Female	63	No	No	GC
1093	Female	57	No	No	GC
1094	Female	59	No	No	GG
1096	Female	51	No	No	GG
1102	Female	54	No	Yes	GC
1110	Female	63	No	No	CC
1122	Male	56	No	No	CC
1134	Male	52	No	No	CC
1139	Male	63	No	No	GC
1143	Male	62	No	No	GC
1145	Male	57	No	No	GC
1153	Male	55	No	No	GG
1160	Male	54	No	No	GC
1161	Male	53	No	Yes	GC
1163	Male	62	No	Yes	GC
1164	Male	56	No	No	GG
1165	Male	58	No	No	GC
1170	Male	60	No	No	GG
1174	Male	67	No	No	GC
1185	Female	61	No	No	GC
1187	Male	61	No	No	GG
1201	Female	65	No	No	GG
1203	Female	62	No	No	CC
1205	Female	60	No	No	GC
1208	Female	56	No	No	GC
1210	Female	63	No	No	GG
1213	Male	59	No	No	CC
1219	Male	59	No	No	GC
1221	Female	50	No	No	GG
1226	Female	65	No	No	GC
1227	Female	62	No	No	GC
1232	Female	60	No	No	GC
1238	Female	53	No	No	GG
1244	Female	63	No	No	GG
1249	Male	54	No	No	GC
1250	Female	59	No	No	GG
1251	Female	55	Yes	No	GG
1264	Female	58	No	No	GC
1269	Female	60	No	No	GG
1276	Female	60	No	No	GG
1285	Male	56	No	No	GC
1287	Male	57	No	No	GG
1288	Male	59	No	No	GC
1303	Male	60	No	No	GG
1305	Male	60	No	No	GG
1310	Male	57	No	No	GG
1318	Male	70	No	No	GC
1326	Female	52	No	No	GG
1351	Female	54	No	No	GC
1354	Female	65	No	Yes	CC
1358	Female	55	No	No	GG
1363	Male	61	No	No	GC
1365	Male	54	No	No	GC
1371	Male	58	No	No	GC
1375	Male	54	No	No	GC
1384	Male	64	No	No	GC
1388	Male	60	No	No	GC
1390	Male	62	No	No	CC
1396	Male	53	No	No	GG
1401	Male	54	No	No	GG
1420	Female	53	No	No	GC
1421	Male	60	No	No	GC
1433	Male	62	No	No	GG
1444	Male	66	No	No	CC
1447	Female	63	No	No	GC
1452	Female	57	No	No	CC
1459	Female	55	No	No	GC
1460	Female	59	No	No	GG
1463	Female	58	No	No	GC
1465	Female	61	No	No	CC
1467	Female	64	No	No	GC
1474	Female	65	No	No	GG
1475	Female	57	No	No	CC
1478	Female	58	No	No	CC
1481	Female	62	No	No	GC
1486	Female	56	No	No	GG
1489	Female	61	No	No	GG
1491	Female	60	No	No	GC
1504	Female	64	No	No	GC
1506	Female	61	No	No	GC
1507	Female	61	No	No	GC
1509	Female	56	No	No	GC
1510	Male	57	No	No	GC
1513	Male	54	No	No	CC
1517	Female	65	No	No	GG
1527	Female	65	No	No	GC
1531	Female	60	No	No	GG
1532	Female	59	Yes	No	GG
1540	Female	56	No	No	GG
1543	Female	62	No	No	GG
1547	Female	57	No	No	GC
1552	Female	67	No	No	GG
1553	Female	54	No	No	GC
1561	Female	59	No	No	GG
1562	Female	58	No	No	GC
1563	Female	64	No	No	GG
1571	Female	64	No	No	GC
1577	Female	53	No	No	GG
1582	Female	50	No	No	GC
1587	Female	54	No	No	GC
1588	Female	51	No	No	GC
1593	Male	59	No	No	GG
1595	Male	65	No	No	GC
1598	Male	59	No	No	CC
1600	Male	57	No	No	CC
1617	Male	57	No	No	GC
1622	Male	60	No	No	GC
1624	Male	60	No	No	GC
1628	Male	56	No	No	CC
1629	Male	55	No	No	GG
1634	Male	55	No	No	GG
1635	Male	62	No	No	GC
1637	Male	56	No	Yes	GC
1642	Male	54	No	No	GC
1644	Male	53	No	No	GC
1646	Male	59	No	Yes	GC
1649	Male	50	No	No	GC
1654	Male	53	No	No	GC
1662	Male	68	No	No	GG
1666	Male	64	No	No	GC
1678	Male	60	No	Yes	GC
1680	Male	58	No	No	GC
1684	Male	62	No	No	CC
1686	Male	51	No	No	GC
1689	Female	59	No	No	GC
1691	Female	55	No	No	GG
1692	Female	51	No	No	GG
1696	Female	61	Yes	No	GG
1706	Female	61	No	No	GC
1708	Female	56	No	No	GG
1709	Female	56	No	No	GG
1712	Female	57	No	No	GC
1714	Female	54	No	No	GC
1725	Male	59	No	No	CC
1727	Male	57	No	No	CC
1740	Male	64	No	No	GC
1767	Male	58	No	No	GC
1771	Male	60	No	No	GG
1774	Male	56	No	No	GG
1780	Male	58	No	No	GG
1782	Male	55	No	No	GC
1784	Female	54	No	No	GC
1786	Male	56	No	No	CC
1792	Female	58	No	No	GG
1795	Male	56	No	No	GC
1797	Female	60	No	No	GG
1801	Male	65	No	No	GC
1805	Female	58	No	No	GG
1806	Female	55	No	No	GC
1809	Female	54	No	No	GC
1811	Female	53	No	No	GC
1816	Male	51	No	No	GG
1818	Female	59	No	Yes	GC
1821	Female	55	No	No	GG
1823	Female	63	No	No	GC
1826	Male	55	No	No	GG
1827	Male	57	No	No	GC
1830	Female	68	No	No	GG
1834	Female	60	Yes	No	CC
1837	Female	63	No	No	GG
1839	Female	60	No	No	GG
1870	Male	50	No	No	GC
1872	Female	57	No	No	GC
1874	Female	63	No	No	CC
1875	Female	71	No	No	GC
1876	Female	67	No	No	GG
1878	Female	55	No	No	GG
1879	Female	58	Yes	No	GG
1880	Female	55	No	No	CC
1881	Female	52	No	No	GC
1885	Female	61	No	No	GC
1886	Male	59	No	No	GC
1889	Female	64	No	No	GC
1890	Female	64	No	No	GC
1891	Female	66	No	No	GG
1899	Male	52	No	No	GG
1908	Female	62	No	Yes	GC
1910	Female	55	No	Yes	CC
1915	Female	63	No	No	GG
1919	Female	51	No	No	GC
1929	Male	67	No	No	GG
1936	Female	56	No	No	GG
1939	Female	54	No	No	GC
1943	Female	61	No	No	GG
1944	Male	61	No	No	CC
1945	Male	51	No	Yes	GC
1950	Male	63	No	No	GC
1952	Female	60	No	No	CC
1953	Female	60	No	No	GC
1954	Female	64	No	No	GG
1955	Female	63	No	No	GC
1958	Female	56	No	No	GC
1962	Female	55	No	No	GG
1963	Female	55	No	No	GC
1965	Female	57	No	No	GC
1968	Female	60	No	No	GG
1973	Male	56	No	No	GG
1976	Male	60	No	No	GC
1977	Male	62	Yes	No	GG
1980	Male	62	No	No	GG
1983	Male	58	No	No	GG
1984	Male	54	No	No	GG
1985	Male	60	No	No	GC
1988	Male	63	No	No	GG
1992	Female	50	No	No	GG
1998	Male	53	No	No	GG
2006	Male	62	No	No	GC
2007	Male	54	No	No	GC
2010	Male	59	No	No	GC
2012	Male	51	No	No	GG
2021	Male	57	No	No	GG
2022	Male	63	No	No	GC
2026	Male	64	No	No	GG
2028	Male	62	No	No	GC
2033	Male	56	No	No	GC
2044	Male	61	No	No	GG
2067	Male	59	No	No	GC
2077	Male	57	No	No	GC
2079	Male	53	No	Yes	GG
2094	Male	55	No	No	GC
2103	Male	63	No	No	GG
2112	Male	55	No	No	GG
2121	Male	62	No	No	GG
2124	Male	56	No	No	CC
2131	Male	56	No	No	GC
2135	Male	53	No	No	GC
2136	Male	61	No	No	GG
2137	Male	61	No	No	GC
2142	Male	60	No	No	GG
2148	Male	63	No	No	GG
2150	Male	56	No	No	GC
2159	Male	61	No	No	CC
2165	Male	65	No	No	GC
2166	Male	64	No	Yes	GG
2171	Male	60	No	No	GG
2173	Male	61	No	No	CC
2175	Male	62	No	No	GG
2184	Male	58	No	Yes	GC
2186	Male	60	No	No	GG
2191	Male	58	No	No	CC
2194	Male	57	No	No	GG
2195	Male	61	No	No	GC
2199	Male	61	No	No	CC
2202	Male	56	No	No	GC
2204	Male	58	No	No	GG
2210	Male	59	No	Yes	GC
2220	Male	59	No	No	CC
2231	Female	59	No	No	GC
2241	Male	53	No	No	GC
2244	Male	63	Yes	Yes	GC
2245	Male	54	No	No	GC
2249	Male	50	No	No	GC
2250	Male	59	No	No	CC
2251	Male	57	No	No	GC
2253	Male	57	No	No	GC
2254	Male	63	No	No	CC
2255	Male	52	No	Yes	GG
2269	Male	63	No	No	GC
2277	Male	60	No	No	GC
2278	Male	66	No	Yes	GG
2283	Male	56	No	No	GC
2287	Male	62	No	No	GC
2290	Male	57	No	No	GC
2297	Male	51	No	No	CC
2299	Male	63	No	No	GC
2302	Male	51	No	No	GG
2310	Male	61	No	No	GC
2313	Male	59	No	No	GC
2314	Male	52	No	No	GG
2315	Male	56	No	No	GG
2322	Male	62	No	No	GG
2323	Male	56	No	Yes	GG
2339	Male	51	No	No	GG
2342	Male	55	No	No	GC
2343	Male	59	No	No	GC
2346	Male	58	No	No	GC
2350	Male	51	No	No	GC
2354	Male	53	No	No	GG
2364	Male	58	No	No	GC
2366	Male	54	No	No	GC
2369	Male	56	No	No	GC
2373	Male	64	No	No	GC
2376	Male	64	No	No	GG
2381	Male	59	No	No	GG
2388	Male	62	No	No	GC
2400	Male	55	No	No	GG
2401	Male	62	No	No	GG
2402	Male	53	No	No	GG
2403	Male	56	No	Yes	GC
2404	Male	55	No	No	GG
2407	Male	56	No	No	GC
2408	Male	55	No	No	GG
2418	Male	58	No	No	GC
2427	Male	62	No	No	GC
2429	Male	53	No	No	GG
2434	Male	69	No	No	GG
2441	Male	62	No	No	GG
2444	Male	63	No	No	GC
2450	Male	61	No	Yes	GC
2454	Male	55	No	No	GC
2458	Male	61	No	No	CC
2463	Male	60	No	No	GC
2464	Male	63	No	No	GC
2465	Male	56	No	No	GG
2466	Male	63	No	No	GG
2468	Male	54	No	No	GC
2471	Male	49	No	Yes	GG
2475	Male	62	No	No	GG
2479	Male	62	No	No	GC
2480	Male	58	No	No	GC
2486	Male	54	No	No	CC
2487	Male	59	No	No	GG
2488	Male	59	No	No	GC
2489	Male	64	No	No	GG
2500	Male	50	No	No	CC
2502	Male	60	No	No	GC
2503	Male	47	No	No	CC
2504	Male	54	No	No	GG
2507	Male	56	No	No	GC
2508	Male	55	No	No	GG
2511	Male	65	No	No	GC
2514	Male	58	Yes	No	GC
2515	Male	51	No	No	GC
2522	Male	59	No	No	GC
2534	Male	57	No	No	GC
2535	Male	60	No	No	GG
2537	Male	62	No	No	GG
2539	Male	66	No	No	GG
2556	Male	58	No	No	GG
2558	Male	59	No	No	GG
2572	Male	52	No	No	GG
2585	Male	72	No	No	CC
2599	Male	63	No	No	GC
2604	Male	63	No	No	GC
2605	Male	51	No	No	GG
2607	Male	63	No	No	GG
2621	Male	65	No	No	GG
2627	Male	55	No	No	GC
2636	Male	65	No	No	GG
2647	Male	65	No	No	GC
2648	Male	62	No	Yes	GG
2649	Male	57	No	No	GC
2671	Male	60	No	No	GG
2674	Male	57	No	No	GC
2676	Male	58	No	No	GC
2685	Male	63	No	No	GG
2689	Male	60	No	No	GC
2696	Female	62	No	Yes	GC
2698	Male	59	No	No	GC
2699	Female	54	No	No	GC
2701	Female	49	No	No	GC
2707	Female	57	No	No	CC
2712	Female	67	No	No	CC
2717	Male	58	No	Yes	GC
2722	Male	57	No	No	GC
2727	Male	54	No	No	GC
2728	Male	53	No	No	GG
2733	Male	59	No	No	CC
2746	Female	61	No	No	GC
2750	Female	60	No	No	GC
2756	Female	63	No	No	GC
2757	Female	58	No	No	GC
2761	Female	55	No	No	GG
2762	Female	60	No	No	GG
2764	Female	62	No	No	GG
2766	Female	66	No	No	GC
2774	Female	64	No	No	GC
2781	Female	64	No	No	GC
2786	Female	51	No	No	GC
2792	Female	63	No	No	GC
2797	Female	62	No	No	GC
2798	Male	63	No	No	GC
2800	Male	56	No	No	GC
2803	Male	62	No	No	GC
2808	Female	54	No	No	GC
2810	Female	60	No	No	GC
2818	Female	68	No	No	GC
2822	Male	54	No	No	GC
2823	Female	50	No	No	CC
2824	Female	59	No	No	CC
2829	Female	61	No	No	GC
2831	Female	58	No	No	GG
2835	Female	54	No	No	GG
2838	Male	56	No	No	GG
2853	Female	53	No	No	GG
2854	Female	51	No	No	GC
2864	Female	58	No	No	GG
2865	Female	60	No	No	GG
2867	Female	62	No	No	GC
2872	Male	59	No	No	GG
2874	Male	56	No	No	GG
2876	Male	64	No	No	GC
2877	Male	55	No	No	GC
2886	Male	59	No	Yes	GC
2889	Male	63	No	No	GC
2893	Male	59	No	No	GG
2897	Female	62	No	No	GG
2898	Female	55	No	No	GG
2906	Female	58	No	No	CC
2912	Male	54	No	No	GG
2913	Male	55	No	No	GG
2919	Male	62	No	No	GG
2937	Male	56	No	No	GG
2938	Male	62	No	No	GC
2941	Male	59	No	No	GG
2947	Male	58	No	No	GC
2950	Male	54	No	No	GC
2951	Male	55	No	No	GC
2953	Male	50	No	No	GG
2955	Male	61	No	No	GC
2957	Male	59	No	No	GG
2968	Male	57	No	No	GG
2971	Male	53	No	No	GC
2972	Male	57	No	No	CC
2973	Male	58	No	No	CC
2974	Male	54	No	No	GG
2977	Male	55	No	No	GG
2978	Male	54	No	No	GG
2987	Male	60	No	No	GG
2988	Male	67	No	No	GC
2998	Male	62	No	Yes	GC
3015	Male	62	No	No	GG
3016	Male	61	No	No	GG
3022	Male	62	No	No	GG
3030	Male	58	No	No	GC
3032	Male	61	No	No	GG
3034	Male	56	No	No	GC
3040	Male	56	No	No	GG
3041	Male	53	No	No	GC
3044	Male	64	No	No	GG
3049	Male	55	No	No	GG
3052	Male	59	No	No	GG
3057	Male	62	No	No	CC
3058	Male	49	No	No	GC
3059	Male	60	No	No	GG
3063	Male	62	No	No	GC
3064	Male	60	No	No	GG
3071	Male	55	No	No	GG
3074	Male	63	No	No	GG
3080	Male	62	No	No	GC
3081	Male	63	No	No	GC
3083	Male	58	No	No	CC
3089	Male	59	No	No	CC
3095	Male	56	No	No	GC
3097	Male	65	No	No	GC
3104	Male	59	No	No	GG
3107	Male	52	No	No	GG
3108	Male	59	No	No	GC
3118	Male	57	No	No	CC
3129	Male	59	No	No	GC
3134	Male	55	No	No	GC
3143	Male	64	No	Yes	GC
3144	Male	58	No	No	GG
3157	Male	60	No	No	GC
3158	Male	55	No	No	GG
3159	Male	58	No	Yes	GC
3175	Male	64	No	No	GC
3178	Male	59	No	No	CC
3184	Male	68	No	No	GG
3185	Male	70	No	Yes	CC
3206	Male	61	No	No	GC
3210	Male	59	No	No	GG
3224	Male	60	No	No	GG
3229	Male	58	No	No	GG
3232	Male	61	No	No	GC
3236	Male	60	No	No	GC
3247	Female	65	No	No	GC
3249	Female	58	No	No	CC
3252	Female	57	No	Yes	GC
3253	Female	69	No	Yes	GC
3257	Female	57	No	No	GG
3260	Female	59	No	No	GC
3263	Female	65	No	No	GC
3265	Female	68	No	Yes	GC
3269	Female	55	No	No	GC
3271	Female	51	No	No	GG
3275	Female	58	No	No	CC
3281	Female	55	No	Yes	GG
3289	Female	63	No	No	GG
3290	Female	60	No	No	GC
3292	Female	55	No	No	GC
3293	Female	58	No	No	GC
3306	Female	56	No	No	GC
3307	Female	60	No	No	GG
3317	Female	59	No	No	GG
3319	Female	57	No	No	CC
3325	Female	61	No	No	GC
3331	Female	61	No	No	GG
3340	Female	53	No	No	GC
3341	Female	62	No	Yes	GC
3347	Female	55	No	No	GC
3349	Female	58	No	No	GC
3350	Female	64	No	No	GC
3351	Female	60	No	Yes	CC
3356	Female	61	No	No	GC
3358	Female	63	No	No	GC
3364	Female	55	No	No	CC
3368	Female	59	No	No	GC
3371	Female	58	No	Yes	GG
3372	Female	62	No	No	CC
3374	Female	60	No	No	GC
3375	Female	58	No	Yes	GG
3377	Female	63	No	No	GC
3378	Female	60	No	No	GG
3381	Female	52	No	No	GC
3385	Female	60	No	Yes	GG
3390	Female	59	No	No	GC
3396	Female	60	No	Yes	GC
3397	Female	60	Yes	No	GG
3399	Female	58	No	No	GG
3406	Female	55	No	Yes	GC
3408	Female	57	No	No	GC
3409	Female	59	No	No	CC
3411	Female	60	No	No	GC
3416	Female	55	No	Yes	GC
3420	Female	57	No	No	GC
3422	Female	60	No	No	GC
3423	Female	55	No	No	GC
3424	Female	64	No	No	GC
3425	Female	63	No	No	GG
3430	Female	61	No	Yes	GG
3435	Female	63	No	No	GG
3439	Female	60	No	No	CC
3444	Female	59	No	No	GG
3455	Female	56	No	No	GC
3458	Female	57	No	No	GG
3464	Female	53	No	No	GG
3465	Female	61	No	No	GC
3468	Female	61	No	No	GG
3475	Female	63	No	No	GG
3491	Female	58	No	Yes	GC
3497	Female	62	No	No	GC
3500	Female	62	No	Yes	GG
3501	Female	66	No	No	GC
3505	Female	66	No	No	GC
3509	Female	54	No	Yes	GG
3515	Female	51	No	No	GC
3519	Female	54	No	No	GC
3520	Female	54	No	No	GC
3523	Female	62	No	No	GG
3525	Female	57	No	No	GC
3528	Female	59	No	No	GC
3529	Female	61	No	No	GG
3531	Female	60	No	No	CC
3547	Female	59	No	No	GG
3553	Female	59	No	No	GC
3555	Female	67	No	No	GC
3556	Female	56	No	No	GC
3557	Female	67	No	No	GC
3572	Female	55	No	No	GC
3577	Female	60	No	No	GC
3585	Female	52	Yes	No	GC
3586	Female	57	No	No	GG
3589	Female	53	No	Yes	CC
3593	Female	55	No	No	GC
3595	Female	62	No	No	CC
3597	Female	52	No	No	CC
3600	Female	56	No	No	GG
3603	Female	64	No	No	GG
3605	Female	58	No	No	CC
3606	Female	58	No	No	GG
3615	Female	59	No	No	CC
3619	Female	64	No	No	GG
3622	Female	57	No	No	GC
3628	Female	69	No	No	GG
3629	Female	54	Yes	No	GC
3634	Female	57	No	No	GC
3642	Female	60	No	No	GC
3643	Female	57	No	Yes	GG
3644	Female	62	No	No	CC
3647	Female	56	No	No	GG
3653	Female	56	No	No	GG
3654	Female	61	No	No	GC
3657	Female	54	No	Yes	CC
3658	Female	57	Yes	No	GC
3662	Female	55	No	No	CC
3663	Female	63	No	No	GC
3664	Female	47	No	No	GC
3667	Female	54	No	No	GG
3670	Female	61	No	No	GC
3671	Female	64	No	No	GG
3675	Female	59	No	No	GC
3679	Female	55	No	No	GC
3681	Female	55	No	Yes	GC
3682	Female	52	No	No	GC
3686	Female	69	No	No	GC
3693	Female	65	No	No	GC
3703	Female	63	No	No	GC
3713	Female	64	No	No	CC
3720	Female	54	No	No	GC
3721	Female	60	No	No	CC
3726	Female	59	No	No	GC
3743	Female	57	No	No	GG
3745	Female	58	Yes	No	GC
3749	Female	52	No	No	GC
3750	Female	63	No	No	GC
3757	Female	57	No	No	GG
3763	Female	58	No	No	CC
3766	Female	57	No	No	GG
3767	Female	55	No	No	GG
3769	Female	62	No	No	CC
3772	Female	60	Yes	No	GG
3774	Female	61	No	No	GC
3779	Female	61	No	No	GC
3784	Female	60	No	No	GC
3788	Female	60	No	No	GG
3789	Female	59	No	Yes	GG
3793	Female	57	No	No	GG
3794	Female	49	No	No	GG
3800	Female	54	No	No	GG
3809	Female	61	No	No	GG
3810	Female	69	No	No	CC
3823	Female	61	No	No	GG
3825	Female	51	No	No	CC
3827	Female	55	No	No	GC
3828	Female	56	No	No	GC
3836	Female	50	No	No	GC
3851	Female	58	No	No	GG
3857	Female	55	No	No	GG
3864	Female	67	No	Yes	GC
3866	Female	56	No	No	GG
3867	Female	62	No	No	GG
3868	Female	56	No	No	GC
3879	Female	59	Yes	No	CC
3880	Female	65	No	No	GC
3884	Female	62	No	No	CC
3892	Female	64	No	No	CC
3895	Female	60	No	Yes	GG
3911	Female	62	No	No	GC
3914	Female	61	No	No	GC
3916	Female	57	No	No	GG
3918	Female	64	No	No	CC
3919	Female	58	No	No	GC
3921	Female	56	No	No	GC
3925	Female	58	Yes	No	CC
3930	Female	58	No	No	GC
3931	Female	60	Yes	No	GG
3936	Female	58	No	No	GC
3939	Female	60	No	No	GG
3940	Female	56	No	No	CC
3941	Female	57	No	No	CC
3943	Female	61	No	No	GG
3951	Female	55	No	Yes	GC
3956	Female	61	No	No	GC
3959	Female	63	No	No	GG
3967	Female	62	No	No	GG
3969	Female	64	No	No	CC
3970	Female	54	No	No	GC
3975	Female	66	No	Yes	GC
3981	Female	54	No	No	GC
3982	Female	59	No	No	GC
3986	Female	59	No	No	GC
3987	Female	56	No	No	CC
3995	Female	57	No	Yes	GC
3997	Female	65	No	No	GG
4004	Female	56	No	No	GC
4006	Female	61	No	Yes	GG
4007	Female	51	No	No	GG
4008	Female	62	No	No	GG
4010	Female	52	No	No	GG
4013	Female	59	No	Yes	GG
4015	Female	60	No	No	GC
4020	Female	57	No	No	GC
4021	Female	61	No	No	GC
4023	Female	54	No	Yes	GG
4024	Female	57	No	No	GG
4029	Female	55	No	No	GC
4030	Female	63	No	No	GG
4031	Female	58	No	No	GC
4034	Female	58	No	No	GG
4035	Female	61	No	No	GC
4037	Female	55	No	No	GG
4038	Female	56	No	No	CC
4039	Female	56	No	No	CC
4046	Female	62	No	Yes	GG
4047	Female	59	No	No	CC
4049	Female	52	No	No	GG
4060	Female	50	No	No	GG
4064	Female	50	No	No	GG
4065	Female	61	No	No	GC
4069	Female	58	No	Yes	GG
4072	Female	61	No	No	GG
4077	Female	50	No	No	GG
4079	Female	65	No	No	GC
4080	Female	56	No	No	CC
4082	Female	59	No	No	GC
4084	Female	60	No	No	GG
4085	Female	67	No	Yes	GC
4090	Female	59	No	No	GG
4091	Female	55	No	No	GG
4105	Female	63	No	Yes	GC
4107	Female	57	No	No	GC
4108	Female	59	No	No	GG
4110	Female	61	No	Yes	CC
4115	Female	63	No	No	CC
4118	Female	57	No	No	GC
4119	Female	57	No	No	GC
4121	Female	61	No	No	GC
4126	Female	59	No	Yes	GC
4127	Female	60	No	No	GC
4131	Female	57	No	No	GC
4132	Female	56	No	No	GG
4134	Female	60	No	No	GC
4136	Female	67	No	No	GG
4138	Female	57	No	No	GG
4144	Female	58	No	No	GC
4146	Female	53	No	No	GG
4148	Female	57	No	No	GC
4149	Female	59	No	No	GG
4150	Female	61	No	No	GC
4157	Female	58	No	No	GC
4161	Female	61	No	No	CC
4167	Female	61	No	No	GG
4187	Female	74	No	No	GG
4188	Female	58	No	Yes	CC
4191	Female	56	No	No	GG
4196	Female	54	No	No	GC
4197	Female	58	No	No	GG
4198	Female	53	No	No	GG
4201	Female	54	No	No	GG
4208	Female	56	No	No	GC
4211	Female	63	No	No	GG
4214	Female	69	No	Yes	GG
4218	Female	53	No	No	GG
4225	Female	64	No	No	GG
4226	Female	65	No	No	GG
4229	Female	51	No	No	GC
4232	Female	51	No	No	GC
4234	Female	56	No	No	GC
4236	Female	52	No	No	GC
4240	Female	59	No	No	GG
4242	Female	64	No	No	GG
4245	Female	52	No	No	GG
4248	Female	58	No	No	GG
4249	Female	57	No	No	GC
4257	Female	62	No	No	CC
4260	Female	58	Yes	No	GC
4264	Female	58	No	No	GC
4267	Female	51	No	No	GC
4269	Female	54	No	No	GG
4274	Female	56	No	No	GC
4275	Female	66	No	No	GG
4277	Female	53	No	No	GG
4281	Female	63	No	No	GG
4290	Female	64	Yes	Yes	GC
4299	Female	63	No	No	GG
4309	Female	61	No	No	GC
4310	Female	63	No	No	GC
4313	Female	59	No	No	GC
4320	Female	53	No	No	GG
4321	Female	57	No	No	GG
4324	Female	57	No	No	GC
4325	Female	60	No	No	GC
4330	Female	62	No	Yes	GC
4339	Female	55	No	No	GG
4346	Female	56	No	No	CC
4348	Female	55	No	No	GG
4350	Female	53	Yes	No	GC
4351	Female	56	Yes	No	GC
4352	Female	59	No	No	GG
4355	Female	63	No	No	GC
4357	Female	60	No	No	CC
4361	Female	57	No	No	GG
4366	Female	62	No	No	GC
4371	Female	56	No	No	GC
4372	Female	54	No	No	GC
4381	Female	56	No	No	GG
4382	Female	63	Yes	No	GG
4386	Female	54	No	No	GG
4391	Female	59	No	No	GG
4393	Female	57	No	No	GC
4395	Female	50	No	No	GG
4396	Female	57	No	No	GC
4401	Female	50	No	No	GC
4402	Female	53	No	No	GC
4410	Female	52	No	No	GC
4411	Female	59	No	No	GG
4414	Female	58	No	No	GG
4418	Female	54	No	No	GC
4422	Female	54	No	No	GG
4426	Female	55	No	Yes	CC
4430	Female	63	No	No	GC
4438	Female	63	No	No	GG
4439	Female	61	No	Yes	GC
4440	Female	61	No	No	GG
4441	Female	67	No	No	GG
4442	Female	60	No	Yes	GG
4444	Female	54	No	No	GC
4445	Female	63	No	Yes	GC
4448	Female	60	No	No	CC
4449	Female	56	No	Yes	GC
4450	Female	59	No	No	GC
4454	Female	62	No	No	GC
4466	Female	53	No	No	GC
4469	Female	61	No	No	GC
4477	Female	60	No	No	GC
4484	Female	61	No	No	GG
4487	Female	66	No	No	GG
4488	Female	61	No	No	GG
4497	Female	56	No	No	GC
4504	Female	62	No	No	GC
4509	Female	53	No	No	GC
4511	Female	61	No	No	GC
4513	Female	57	No	No	GC
4515	Female	65	No	No	GG
4519	Female	55	No	No	GC
4526	Female	50	No	Yes	GG
4528	Female	56	No	No	GG
4533	Female	61	No	No	GC
4540	Female	54	No	No	GC
4542	Female	58	No	Yes	CC
4546	Female	56	No	No	CC
4551	Female	53	No	No	GG
4554	Female	51	No	No	GC
4556	Female	52	No	No	CC
4558	Female	63	No	No	GG
4559	Female	58	No	No	GG
4561	Female	50	No	No	GC
4562	Female	57	No	Yes	GG
4563	Female	55	No	No	GG
4572	Female	57	No	No	GC
4574	Female	55	No	No	CC
4577	Female	56	No	No	GG
4579	Female	65	No	No	CC
4580	Female	55	No	Yes	CC
4581	Female	56	No	No	GC
4583	Female	63	No	No	GC
4585	Female	54	No	No	GG
4586	Female	53	No	No	GC
4590	Female	58	No	No	GC
4591	Female	59	No	No	GG
4593	Female	58	No	No	CC
4597	Female	60	No	No	CC
4606	Female	57	No	No	GG
4607	Female	58	Yes	No	GG
4608	Female	60	No	No	GG
4610	Female	60	No	No	GG
4615	Female	57	No	No	CC
4616	Female	50	No	No	CC
4620	Female	64	No	No	GG
4623	Female	53	No	No	GC
4624	Female	54	Yes	No	GC
4625	Female	64	No	Yes	CC
4627	Female	57	No	No	GC
4629	Female	54	No	No	GG
4642	Female	59	No	No	GC
4649	Female	64	No	No	GC
4654	Female	57	No	No	GG
4655	Female	59	No	No	GC
4657	Female	50	No	No	CC
4661	Female	61	No	No	GC
4667	Female	58	No	Yes	GC
4670	Female	59	No	No	GC
4672	Female	61	No	Yes	GG
4675	Female	54	No	No	GC
4679	Female	59	No	No	CC
4681	Female	55	No	No	CC
4682	Female	60	No	No	GG
4699	Female	67	No	No	GC
4708	Female	65	No	No	CC
4716	Female	50	No	No	GG
4725	Female	65	No	No	GC
4729	Female	61	Yes	No	GC
4731	Female	61	No	No	GG
4732	Female	51	No	No	GC
4736	Female	56	Yes	No	GC
4743	Female	55	No	No	GC
4745	Female	58	No	No	GG
4747	Female	61	No	No	GC
4750	Female	58	No	No	CC
4752	Female	53	No	No	GC
4754	Female	66	No	No	GC
4755	Female	54	No	No	GG
4768	Female	61	No	No	GG
4771	Female	56	No	No	GG
4774	Female	57	No	No	GC
4775	Female	56	No	No	GC
4777	Female	58	No	No	CC
4780	Female	55	No	No	GC
4783	Female	54	No	No	GG
4787	Female	55	No	No	GG
4789	Female	50	No	No	CC
4792	Female	59	No	No	GG
4794	Female	66	No	No	CC
4814	Female	61	No	No	GG
4816	Female	55	No	No	GC
4818	Female	62	No	No	GG
4819	Female	64	No	No	GG
4822	Female	56	No	No	GC
4825	Female	58	No	No	GC
4827	Female	52	No	No	GC
4831	Female	60	No	Yes	GG
4837	Female	59	No	No	GC
4838	Female	64	No	No	CC
4839	Female	66	No	No	GC
4842	Female	51	No	No	CC
4849	Female	63	No	No	GG
4850	Female	64	No	Yes	GG
4851	Female	55	No	No	GC
4854	Female	55	No	No	GG
4856	Male	51	No	No	CC
4857	Male	56	No	No	GC
4859	Male	55	No	Yes	GG
4869	Male	53	No	No	GG
4871	Male	54	Yes	No	GC
4876	Male	54	No	Yes	CC
4879	Male	52	No	No	GG
4885	Male	59	No	No	CC
4886	Male	54	No	No	GC
4887	Female	61	No	Yes	GC
4893	Male	59	No	Yes	CC
4896	Male	61	No	Yes	GC
4904	Female	63	No	No	GG
4905	Female	65	No	No	CC
4907	Female	53	No	No	GG
4911	Male	62	No	No	GC
4916	Female	65	No	No	GC
4917	Female	57	No	No	GG
4923	Male	58	No	No	GC
4924	Male	56	No	No	GG
4926	Male	58	No	No	GG
4930	Female	60	No	No	GC
4931	Female	58	No	No	GC
4933	Male	61	No	Yes	GC
4936	Female	55	No	No	GG
4940	Female	69	No	No	GG
4944	Female	61	No	No	GG
4950	Female	60	No	Yes	GC
4951	Female	59	No	No	GC
4959	Female	56	No	No	CC
4962	Female	58	No	No	CC
4965	Female	59	No	No	GC
4970	Female	62	No	No	GG
4971	Female	52	No	No	GG
4976	Male	58	No	No	GC
4979	Female	57	No	No	GC
4989	Female	64	No	No	GC
4992	Female	55	Yes	No	GG
4993	Female	56	No	No	GC
4994	Male	58	No	No	GC
4997	Male	56	No	No	GG
5000	Male	60	No	No	GG
5002	Male	54	No	No	GG
5004	Male	59	No	No	CC
5008	Male	60	No	No	GG
5011	Male	50	No	No	GC
5017	Female	59	No	No	GC
5019	Female	55	No	No	GG
5023	Male	58	No	No	GC
5033	Male	55	Yes	No	CC
5042	Female	67	No	No	GC
5046	Male	57	No	No	CC
5048	Male	63	No	No	GG
5053	Female	62	No	No	GG
5054	Male	59	No	No	GG
5055	Male	60	No	No	GG
5064	Male	64	No	No	GC
5066	Female	61	No	No	GC
5067	Male	62	No	No	GC
5071	Male	55	No	No	CC
5073	Male	58	No	No	CC
5075	Female	59	No	No	GG
5088	Female	64	No	No	GC
5092	Female	65	No	No	CC
5093	Female	56	No	No	GC
5097	Female	58	No	No	GG
5099	Female	58	No	No	GC
5104	Female	58	No	No	GC
5110	Female	63	No	No	GG
5116	Female	66	No	Yes	GG
5118	Female	59	No	No	GG
5121	Female	61	No	No	CC
5124	Female	54	No	No	GC
5126	Female	56	No	No	GG
5128	Female	57	No	No	CC
5129	Female	61	No	No	GG
5131	Female	57	No	No	CC
5136	Female	55	No	No	GG
5139	Female	60	No	No	GC
5140	Female	62	No	No	GG
5141	Female	53	No	No	GG
5148	Female	58	No	No	GC
5149	Female	54	No	No	GG
5154	Female	58	No	No	GC
5157	Female	59	No	No	CC
5158	Female	50	No	No	GC
5161	Female	59	No	No	GG
5166	Female	59	No	No	GC
5169	Female	57	No	No	GG
5170	Female	59	No	No	GG
5174	Female	65	No	No	CC
5175	Female	57	No	No	GG
5191	Male	58	No	No	GC
5193	Male	51	No	No	CC
5196	Male	55	No	Yes	GC
5198	Male	58	No	No	GC
5201	Male	63	No	Yes	GG
5203	Male	50	No	No	GC
5210	Male	59	No	No	GG
5214	Male	65	No	No	GG
5217	Male	61	No	No	CC
5221	Male	63	No	No	CC
5224	Male	52	No	No	GC
5225	Male	71	No	No	GC
5228	Female	59	No	No	GC
5232	Female	66	No	No	GC
5236	Male	62	No	No	GC
5237	Male	55	No	No	CC
5239	Male	57	No	No	CC
5240	Male	61	No	No	GC
5243	Female	60	No	No	GG
5244	Female	59	No	No	GG
5248	Female	62	No	No	GG
5252	Male	64	No	No	GG
5255	Female	55	No	No	CC
5258	Female	56	No	No	GC
5259	Female	67	No	No	GC
5260	Female	64	No	No	GC
5263	Female	69	No	No	GG
5264	Female	60	No	No	GC
5266	Female	53	No	No	GG
5267	Female	55	No	No	GC
5269	Female	58	No	No	GC
5271	Female	55	No	No	CC
5272	Female	63	No	No	CC
5282	Male	59	No	No	GG
5292	Male	58	No	No	GG
5295	Female	62	No	No	GG
5301	Female	56	No	No	GG
5306	Female	70	No	No	GC
5308	Female	54	No	No	GC
5314	Male	59	No	No	GC
5316	Female	52	No	No	GC
5317	Female	55	No	No	GG
5329	Female	53	No	No	GG
5342	Male	65	No	No	GG
5345	Female	57	No	No	GC
5346	Female	54	No	No	GG
5349	Female	58	No	No	GC
5350	Female	59	No	No	GC
5351	Female	52	No	No	GC
5361	Male	61	No	No	GC

## Sheet: Atherosclerosis study
Participant number	Gender	Age	Irradiation status	Hypertension	Diabetes	Smoking pack years	Plaques presence	Stenosis	Intima media thickness	IL6-174 genotype
15	Male	60	Irradiated	Yes	No	0	No	None or < 30%	Normal	GG
64	Male	61	Irradiated	Yes	Yes	120	Yes	None or < 30%	Normal	CC
69	Male	65	Irradiated	No	No	20	Yes	≥ 30%	Normal	GC
70	Male	66	Irradiated	No	Yes	90	No	None or < 30%	Normal	GG
75	Male	66	Irradiated	Yes	No	8	Yes	≥ 30%	Increased	GG
89	Male	66	Irradiated	Yes	Yes	0	Yes	None or < 30%	Normal	GC
90	Male	57	Irradiated	Yes	No		Yes	None or < 30%	Normal	GC
108	Male	64	Irradiated	No	Yes	30	Yes	≥ 30%	Normal	GC
110	Male	64	Irradiated	Yes	No	0	Yes	≥ 30%	Normal	GC
149	Female	62	Irradiated	No	No	0	No	None or < 30%	Normal	GC
171	Male	62	Irradiated	Yes	No	40	Yes	≥ 30%	Increased	GG
174	Male	60	Irradiated	Yes	No	60	No	None or < 30%	Normal	GC
179	Male	66	Irradiated	No	No	0	No	None or < 30%	Normal	GC
270	Male	56	Irradiated	No	No	0	No	None or < 30%	Normal	GC
285	Male	73	Irradiated	Yes	Yes	15	No	None or < 30%	Normal	GG
310	Male	65	Irradiated	No	No	0	No	None or < 30%	Normal	GG
339	Female	66	Irradiated	No	No	0	No	None or < 30%	Normal	GC
352	Female	66	Irradiated	Yes	No	0	No	None or < 30%	Normal	GG
355	Male	68	Irradiated	Yes	Yes	40	No	None or < 30%	Normal	GG
360	Male	57	Irradiated			52.5	Yes	None or < 30%	Normal	GC
386	Male	68	Irradiated	Yes	No	20	Yes	None or < 30%	Increased	GG
391	Male	69	Irradiated	No	No	55	Yes	≥ 30%	Increased	GC
416	Female	60	Irradiated	Yes	No	0	No	None or < 30%	Normal	GC
420	Female	71	Irradiated	Yes	No	0	No	None or < 30%	Normal	GC
426	Female	67	Irradiated	Yes	Yes	0	Yes	None or < 30%	Normal	GC
443	Female	61	Irradiated	No	No	0	No	None or < 30%	Normal	GG
446	Female	60	Irradiated	No	No	0	No	None or < 30%	Normal	GC
449	Female	65	Irradiated	Yes	Yes	0	Yes	None or < 30%	Normal	GC
473	Female	64	Irradiated	No	No	0	No	None or < 30%	Normal	GG
474	Female	62	Irradiated	Yes	No	0	Yes	None or < 30%	Normal	GG
485	Female	68	Irradiated	Yes	Yes	0	Yes	None or < 30%	Normal	GC
496	Female	71	Irradiated	Yes	No	0	Yes	None or < 30%	Normal	GG
502	Female	66	Irradiated	Yes	No	0	No	None or < 30%	Normal	GC
504	Female	55	Irradiated	No	No	0	No	None or < 30%	Normal	GC
540	Female	62	Irradiated	No	No	0	Yes	None or < 30%	Normal	GG
544	Female	62	Irradiated	No	No	0	Yes	None or < 30%	Normal	GC
547	Male	59	Irradiated	No	No	14	No	None or < 30%	Normal	GC
548	Male	67	Irradiated	No	No	20	No	None or < 30%	Normal	GC
554	Male	62	Irradiated	Yes	Yes	0	Yes	None or < 30%	Increased	GG
590	Male	58	Irradiated			0	Yes	≥ 30%	Normal	CC
615	Male	65	Irradiated	Yes	No	0	No		Increased	GG
678	Male	63	Irradiated	No	No	30	Yes	≥ 30%	Increased	GC
702	Male	58	Irradiated				Yes	None or < 30%	Normal	GC
716	Male	63	Irradiated	No	No	30	Yes	None or < 30%	Increased	GG
734	Male	63	Irradiated	Yes	Yes	0	No	None or < 30%	Normal	GC
746	Male	63	Irradiated	Yes	Yes	0	Yes	None or < 30%	Normal	GG
753	Male	63	Irradiated	Yes	No	76	No	None or < 30%	Increased	GG
804	Male	66	Irradiated	Yes	Yes	40	No	None or < 30%	Increased	GC
863	Male	63	Irradiated	Yes	No	0	No	None or < 30%	Normal	GG
888	Male	65	Irradiated	No	Yes	34	Yes	≥ 30%	Normal	GC
898	Male	55	Irradiated	No	No	0	No	None or < 30%	Normal	GG
911	Male	63	Irradiated	Yes	Yes	2.5	Yes	None or < 30%	Increased	GC
912	Male	63	Irradiated	No	No	30	No	None or < 30%	Normal	GC
926	Male	57	Irradiated	Yes	Yes	25	Yes	≥ 30%	Normal	GG
947	Male	68	Irradiated	No	Yes	7.5	Yes	None or < 30%	Normal	GC
951	Male	61	Irradiated	Yes	No	55	No	None or < 30%	Normal	GC
962	Male	60	Irradiated	No	No	0	No	None or < 30%	Normal	GG
964	Male	60	Irradiated	No	No		No	None or < 30%	Normal	CC
998	Male	63	Irradiated	No	No	117	No	None or < 30%	Normal	GC
1039	Female	58	Irradiated	No	No	0	No	None or < 30%	Normal	CC
1042	Female	60	Irradiated	Yes	No	0	No	None or < 30%	Increased	GC
1044	Male	62	Irradiated	No	No	0	Yes	None or < 30%	Increased	GC
1050	Female	63	Irradiated	Yes	Yes	0	No	None or < 30%	Normal	GG
1055	Female	66	Irradiated	No	No	0	No	None or < 30%	Normal	GC
1073	Female	69	Irradiated	Yes	No	0	No	None or < 30%	Normal	CC
1078	Male	70	Irradiated	Yes	Yes	25	Yes	None or < 30%	Increased	GG
1093	Female	62	Irradiated	Yes	Yes	80	No	None or < 30%	Normal	GC
1096	Female	59	Irradiated	No	No	5	No	None or < 30%	Normal	GG
1139	Male	68	Irradiated	Yes	Yes	0	Yes	≥ 30%	Normal	GC
1145	Male	64	Irradiated	Yes	No	45	No	None or < 30%	Normal	GC
1153	Male	59	Irradiated	No	No	17	Yes	None or < 30%	Normal	GG
1161	Male	61	Irradiated	No	No	0	No	None or < 30%	Normal	GC
1165	Male	66	Irradiated	No	No	8	Yes	None or < 30%	Normal	GC
1205	Female	65	Irradiated	No	No	0	Yes	None or < 30%	Normal	GC
1227	Female	70	Irradiated	Yes	Yes	0	Yes	≥ 30%	Increased	GC
1249	Male	63	Irradiated	No	No	4	No	None or < 30%	Normal	GC
1251	Female	63	Irradiated	Yes	No	0	No	None or < 30%	Normal	GG
1264	Female	62	Irradiated	Yes	Yes	0	No	None or < 30%	Normal	GC
1269	Female	63	Irradiated	Yes	No	0	Yes	≥ 30%	Normal	GG
1318	Male	73	Irradiated	Yes	No	0	Yes	≥ 30%	Increased	GC
1358	Female	58	Irradiated	Yes	No	0	No	None or < 30%	Normal	GG
1390	Male	64	Irradiated	Yes	Yes	0	Yes	None or < 30%	Increased	CC
1396	Male	58	Irradiated	Yes	Yes	0	Yes	None or < 30%	Normal	GG
1421	Male	67	Irradiated	No	No	0	No	None or < 30%	Normal	GC
1452	Female	62	Irradiated	Yes	No	0	Yes	None or < 30%	Normal	CC
1460	Male	65	Irradiated	No	No	20	No	None or < 30%	Normal	GG
1463	Female	64	Irradiated	No	No	0	No	None or < 30%	Normal	GC
1478	Female	62	Irradiated	Yes	No	0	Yes	None or < 30%	Normal	CC
1510	Male	63	Irradiated	No	No	15	No	None or < 30%	Normal	GC
1525	Female	58	Irradiated	No	No	67.5	Yes	None or < 30%	Increased	GC
1543	Female	67	Irradiated	Yes	Yes	0	No	None or < 30%	Normal	GG
1552	Female	75	Irradiated	Yes	Yes	0	No	None or < 30%	Normal	GG
1553	Female	61	Irradiated	Yes	Yes	0	No	None or < 30%	Normal	GC
1562	Female	66	Irradiated	Yes	Yes	0	No	None or < 30%	Normal	GC
1587	Female	59	Irradiated	No	No	0	No	None or < 30%	Normal	GC
1598	Male	65	Irradiated	Yes	No	40	Yes	None or < 30%	Increased	CC
1600	Male	66	Irradiated	Yes	No	25	Yes	None or < 30%	Normal	CC
1617	Male	64	Irradiated	Yes	Yes	22	Yes	≥ 30%	Increased	GC
1624	Male	65	Irradiated	No	Yes	0	No	None or < 30%	Normal	GC
1635	Male	67	Irradiated	Yes	No	0	Yes	≥ 30%	Normal	GC
1649	Male	59	Irradiated	No	No	0	No	None or < 30%	Normal	GC
1666	Male	71	Irradiated	Yes	No	10	Yes	None or < 30%	Increased	GC
1680	Male	60	Irradiated	Yes	Yes	25	Yes	≥ 30%	Increased	GC
1684	Male	67	Irradiated	Yes	No	20	Yes	≥ 30%	Increased	CC
1708	Female	61	Irradiated			0	No	None or < 30%	Normal	GG
1709	Female	60	Irradiated	No	No	45	No	None or < 30%	Normal	GG
1774	Male	60	Irradiated	Yes	Yes	30	Yes	None or < 30%	Normal	GG
1784	Female	62	Irradiated	Yes	No	0	Yes	None or < 30%	Normal	GC
1795	Male	61	Irradiated	No	No	45	Yes	None or < 30%	Increased	GC
1806	Female	59	Irradiated	Yes	Yes	0	No	None or < 30%	Normal	GC
1816	Male	56	Irradiated	No	No	20	No	None or < 30%	Normal	GG
1821	Female	60	Irradiated	Yes	No	24	No	None or < 30%	Normal	GG
1827	Male	65	Irradiated	Yes	No	40	Yes	None or < 30%	Normal	GC
1837	Female	68	Irradiated	Yes	No	0	Yes	None or < 30%	Normal	GG
1839	Female	65	Irradiated	Yes	Yes	0	No	None or < 30%	Normal	GG
1878	Female	60	Irradiated	Yes	Yes	0	Yes	None or < 30%	Normal	GG
1879	Female	62	Irradiated	No	No	0	No	None or < 30%	Normal	GG
1885	Female	65	Irradiated	Yes	No	0	Yes	≥ 30%	Normal	GC
1886	Male	67	Irradiated	No	Yes	10	Yes	None or < 30%	Normal	GC
1890	Female	68	Irradiated	Yes	No	0	No	None or < 30%	Normal	GC
1899	Male	59	Irradiated	Yes	No	0	No	None or < 30%	Normal	GG
1944	Male	66	Irradiated	Yes	No	46	Yes	≥ 30%	Normal	CC
1950	Male	71	Irradiated	Yes	No	40	Yes	None or < 30%	Increased	GC
1968	Female	64	Irradiated	Yes	Yes	0	No	None or < 30%	Normal	GG
1977	Male	67	Irradiated	No	No	0	No	None or < 30%	Normal	GG
1980	Male	69	Irradiated	No	Yes	20	Yes	≥ 30%	Normal	GG
1985	Male	64	Irradiated	Yes	No	30	Yes	None or < 30%	Normal	GC
1992	Female	57	Irradiated	Yes	Yes	0	No	None or < 30%	Normal	GG
1998	Male	60	Irradiated	No	No	0	No	None or < 30%	Normal	GG
2007	Male	59	Irradiated	No	No	15	No	None or < 30%	Normal	GC
2010	Male	68	Irradiated	Yes	No	28	Yes	≥ 30%	Normal	GC
2028	Male	69	Irradiated	No	No		Yes	None or < 30%	Normal	GC
2077	Male	60	Irradiated	Yes	No	0	Yes	≥ 30%	Normal	GC
2079	Male	61	Irradiated	No	No	25	Yes	None or < 30%	Normal	GG
2103	Male	67	Irradiated	Yes	No	0	Yes	None or < 30%	Normal	GG
2124	Male	62	Irradiated	No	Yes	0	Yes	None or < 30%	Normal	CC
2131	Male	62	Irradiated	No	No	11	No	None or < 30%	Normal	GC
2136	Male	65	Irradiated	Yes	Yes	60	Yes	None or < 30%	Normal	GG
2137	Male	67	Irradiated	No	No	50	Yes	None or < 30%	Increased	GC
2150	Male	61	Irradiated	Yes	Yes	0	Yes	None or < 30%	Increased	GC
2159	Male	68	Irradiated	Yes	Yes	96	Yes	None or < 30%	Increased	CC
2175	Male	66	Irradiated	Yes	No	30	No	None or < 30%	Normal	GG
2186	Male	66	Irradiated	Yes	No	0	No	None or < 30%	Normal	GG
2195	Male	68	Irradiated	Yes	Yes	0	Yes	None or < 30%	Normal	GC
2231	Female	64	Irradiated	No	No	0	No	None or < 30%	Normal	GC
2241	Male	59	Irradiated	No	No	0	No	None or < 30%	Normal	GC
2250	Male	62	Irradiated	Yes	No	0	Yes	≥ 30%	Increased	CC
2253	Male	62	Irradiated	No	No	0	No	None or < 30%	Normal	GC
2273	Male	67	Irradiated	No	No	0	No	None or < 30%	Normal	GC
2278	Male	69	Irradiated	Yes	No	30	No	None or < 30%	Increased	GG
2283	Male	60	Irradiated	No	No	65	Yes	None or < 30%	Normal	GC
2287	Male	67	Irradiated	Yes	No	10	Yes	None or < 30%	Normal	GC
2290	Male	61	Irradiated	Yes	No	20	No	None or < 30%	Normal	GC
2323	Male	61	Irradiated	No	No	0	No	None or < 30%	Normal	GG
2339	Male	57	Irradiated	Yes	No	105	Yes	None or < 30%	Normal	GG
2346	Male	67	Irradiated	No	No	19	Yes	None or < 30%	Normal	GC
2369	Male	61	Irradiated	No	No	0	No	None or < 30%	Normal	GC
2388	Male	66	Irradiated	Yes	No	0	Yes	None or < 30%	Normal	GC
2404	Male	61	Irradiated	Yes	No	0	No	None or < 30%	Normal	GG
2408	Male	58	Irradiated	No	No	0	No	None or < 30%	Normal	GG
2441	Male	67	Irradiated	Yes	Yes	25	Yes	None or < 30%	Normal	GG
2458	Male	66	Irradiated	Yes	No	0	Yes	None or < 30%	Normal	CC
2463	Male	66	Irradiated	Yes	Yes	37.5	No	None or < 30%	Normal	GC
2465	Male	63	Irradiated	No	No	0	No	None or < 30%	Normal	GG
2466	Male	70	Irradiated	No	No	0	No	None or < 30%	Normal	GG
2486	Male	60	Irradiated	No	No	0	Yes	None or < 30%	Normal	CC
2500	Male	57	Irradiated	Yes	No	0	No	None or < 30%	Normal	CC
2502	Male	65	Irradiated	Yes	No	120	No	None or < 30%	Normal	GC
2507	Male	65	Irradiated	No	No	2.5	Yes	None or < 30%	Normal	GC
2621	Male	72	Irradiated	No	No	0	Yes	None or < 30%	Normal	GG
2648	Male	68	Irradiated	Yes	Yes	60	Yes		Increased	GG
2649	Male	65	Irradiated	No	No	3.5	Yes	≥ 30%	Normal	GC
2676	Male	62	Irradiated	Yes	No	80	Yes	None or < 30%	Normal	GC
2701	Female	54	Irradiated	No	No	3	No	None or < 30%	Normal	GC
2746	Female	67	Irradiated	No	No	0	No	None or < 30%	Normal	GC
2750	Female	66	Irradiated	Yes	No	0	No	None or < 30%	Normal	GC
2761	Female	60	Irradiated	No	No	0	No	None or < 30%	Normal	GG
2762	Female	66	Irradiated	Yes	No	0	No	None or < 30%	Normal	GG
2786	Female	55	Irradiated	No	Yes	0	No	None or < 30%	Normal	GC
2798	Male	69	Irradiated	Yes	No	0	Yes	None or < 30%	Normal	GC
2803	Male	66	Irradiated	Yes	No	40	Yes	None or < 30%	Increased	GC
2810	Female	64	Irradiated	Yes	No	0	Yes	≥ 30%	Normal	GC
2824	Female	64	Irradiated	No	No	0	No	None or < 30%	Increased	CC
2835	Female	59	Irradiated	No	No	30	Yes	None or < 30%	Normal	GG
2853	Female	59	Irradiated	Yes	No	0	No	None or < 30%	Normal	GG
2854	Female	56	Irradiated	No	No	0	Yes	None or < 30%	Normal	GC
2867	Female	68	Irradiated	Yes	No	0	Yes		Normal	GC
2874	Male	63	Irradiated	Yes	No	15	No	None or < 30%	Normal	GG
2906	Female	63	Irradiated	Yes	No	0	Yes	None or < 30%	Normal	CC
2938	Male	66	Irradiated	Yes	No		Yes	≥ 30%	Increased	GC
2947	Male	63	Irradiated	Yes	Yes	50	Yes	None or < 30%	Normal	GC
2950	Male	59	Irradiated	No	No	5	No	None or < 30%	Normal	GC
2953	Male	58	Irradiated	Yes	Yes	0	No	None or < 30%	Normal	GG
2957	Male	65	Irradiated	No	No	14	No	None or < 30%	Normal	GG
2971	Male	59	Irradiated	No	No	47	Yes	None or < 30%	Normal	GC
2977	Male	63	Irradiated	Yes	No	0	Yes	None or < 30%	Normal	GG
3030	Male	64	Irradiated	No	No	10	No	None or < 30%	Normal	GC
3049	Male	60	Irradiated	Yes	No	15	Yes	None or < 30%	Normal	GG
3057	Male	68	Irradiated	Yes	No	0	Yes	None or < 30%	Normal	CC
3058	Male	58	Irradiated	No	No	4	No	None or < 30%	Increased	GC
3063	Male	65	Irradiated	Yes	No	0	No	None or < 30%	Normal	GC
3097	Male	70	Irradiated	No	No	15	Yes	≥ 30%	Increased	GC
3144	Male	63	Irradiated	Yes	No	16	Yes	None or < 30%	Normal	GG
3158	Male	59	Irradiated	Yes	No	0	Yes	None or < 30%	Increased	GG
3159	Male	65	Irradiated	Yes	No	35	No	None or < 30%	Normal	GC
3178	Male	63	Irradiated	No	No	2	No	None or < 30%	Normal	CC
3257	Female	64	Irradiated	Yes	Yes	0	No	None or < 30%	Normal	GG
3269	Female	62	Irradiated	No	No	0	Yes	None or < 30%	Normal	GC
3281	Female	63	Irradiated	Yes	No	0	No	None or < 30%	Normal	GG
3292	Female	61	Irradiated	No	No	0	Yes	None or < 30%	Normal	GC
3293	Female	66	Irradiated	Yes	Yes	0	Yes	None or < 30%	Increased	GC
3307	Female	65	Irradiated	Yes	Yes	0	No	None or < 30%	Normal	GG
3317	Female	64	Irradiated	Yes	No	0	No	None or < 30%	Normal	GG
3319	Female	60	Irradiated	Yes	Yes	0	Yes	None or < 30%	Normal	CC
3325	Female	69	Irradiated	Yes	No	0	No	None or < 30%	Normal	GC
3331	Female	68	Irradiated	No	No	0	No	None or < 30%	Normal	GG
3340	Female	57	Irradiated	No	No	0	Yes	None or < 30%	Normal	GC
3341	Female	67	Irradiated	Yes	No	0	No	None or < 30%	Normal	GC
3349	Female	63	Irradiated	Yes	Yes	0	Yes	None or < 30%	Normal	GC
3358	Female	65	Irradiated	Yes	No	0	Yes	≥ 30%	Normal	GC
3364	Female	62	Irradiated	No	No	0	Yes	None or < 30%	Increased	CC
3375	Female	65	Irradiated	Yes	No	0	No	None or < 30%	Normal	GG
3377	Female	64	Irradiated	Yes	No		No	None or < 30%	Normal	GC
3381	Female	59	Irradiated	Yes	Yes	0	No	None or < 30%	Normal	GC
3390	Female	65	Irradiated	Yes	No	0	No	None or < 30%	Normal	GC
3411	Female	65	Irradiated	No	No	0	Yes	None or < 30%	Normal	GC
3416	Female	58	Irradiated	Yes	Yes	54	No	None or < 30%	Normal	GC
3425	Female	70	Irradiated	Yes	No	0	No	None or < 30%	Normal	GG
3444	Female	62	Irradiated	Yes	No	0	Yes	None or < 30%	Increased	GG
3464	Female	58	Irradiated	No	No	12	Yes	None or < 30%	Normal	GG
3468	Female	66	Irradiated	No	No	0	No	None or < 30%	Normal	GG
3500	Female	67	Irradiated	Yes	No		No	None or < 30%	Normal	GG
3515	Female	58	Irradiated	No	No	0	No	None or < 30%	Normal	GC
3553	Female	65	Irradiated	Yes	No	0	No	None or < 30%	Normal	GC
3556	Female	63	Irradiated	Yes	Yes	0	Yes	None or < 30%	Normal	GC
3586	Female	62	Irradiated	No	No	0	No	None or < 30%	Normal	GG
3593	Female	62	Irradiated	Yes	No	0	Yes	None or < 30%	Normal	GC
3597	Female	59	Irradiated	No	No	0	No	None or < 30%	Normal	GC
3600	Female	60	Irradiated	Yes	No	0	No	None or < 30%	Normal	GG
3619	Female	70	Irradiated	No	No	0	No	None or < 30%	Normal	GG
3693	Female	70	Irradiated	Yes	No	0	No	None or < 30%	Normal	GC
3749	Female	56	Irradiated	No	No	10	No	None or < 30%	Normal	GC
3772	Female	65	Irradiated	Yes	No	0	Yes	None or < 30%	Normal	GG
3784	Female	62	Irradiated	Yes	No	0	No	None or < 30%	Normal	GC
3794	Female	55	Irradiated	No	No		No	None or < 30%	Normal	GG
3800	Female	58	Irradiated	Yes	No	0	No	None or < 30%	Normal	GG
3823	Female	66	Irradiated	Yes	No	0	No	None or < 30%	Normal	GG
3827	Female	63	Irradiated	Yes	No	0	No	None or < 30%	Normal	GC
3836	Female	61	Irradiated	Yes	No	0	Yes	None or < 30%	Normal	GC
3851	Female	63	Irradiated	No	No	0	No	None or < 30%	Normal	GG
3857	Female	62	Irradiated	Yes	No	0	No	None or < 30%	Normal	GG
3895	Female	64	Irradiated	No	No	0	No	None or < 30%	Normal	GG
3919	Female	62	Irradiated	Yes	No	0	Yes	≥ 30%	Normal	GC
3925	Female	64	Irradiated	Yes	No	0	No	None or < 30%	Normal	CC
3930	Female	62	Irradiated	No	No	0	No	None or < 30%	Normal	GC
3943	Female	66	Irradiated	No	No	0	No	None or < 30%	Normal	GG
3951	Female	63	Irradiated	Yes	Yes	0	Yes	≥ 30%	Normal	GC
3967	Female	66	Irradiated	Yes	No	0	No	None or < 30%	Normal	GG
3982	Female	63	Irradiated	Yes	No	0	Yes	≥ 30%	Normal	GC
3986	Female	65	Irradiated	Yes	No	0	Yes	None or < 30%	Normal	GC
4006	Female	66	Irradiated	No	Yes	0	Yes	None or < 30%	Normal	GG
4007	Female	58	Irradiated	No	No	0	No	None or < 30%	Normal	GG
4021	Female	64	Irradiated	No	No	0	No	None or < 30%	Normal	GC
4023	Female	59	Irradiated	No	No	0	No	None or < 30%	Normal	GG
4038	Female	62	Irradiated	Yes	Yes	0	Yes	≥ 30%	Normal	CC
4069	Female	64	Irradiated	Yes	No	0	No	None or < 30%	Normal	GG
4077	Female	57	Irradiated	Yes	No	43	Yes	None or < 30%	Normal	GG
4082	Female	61	Irradiated	No	No	0	No	None or < 30%	Increased	GC
4091	Female	61	Irradiated	No	No	0	No	None or < 30%	Normal	GG
4107	Female	61	Irradiated	No	No	0	No	None or < 30%	Normal	GC
4126	Female	65	Irradiated	No	No	0	No	None or < 30%	Normal	GC
4146	Female	58	Irradiated	Yes	Yes	0	No	None or < 30%	Normal	GG
4150	Female	64	Irradiated	Yes	Yes	0	Yes	≥ 30%	Normal	GC
4157	Female	62	Irradiated	Yes	No	0	No	None or < 30%	Normal	GC
4167	Female	68	Irradiated	Yes	No	0	No	None or < 30%	Normal	GG
4196	Female	60	Irradiated	No	No	0	Yes	None or < 30%	Normal	GC
4197	Female	61	Irradiated	Yes	No	0	No	None or < 30%	Normal	GG
4201	Female	60	Irradiated	No	No	0	No	None or < 30%	Normal	GG
4208	Female	60	Irradiated	No	No	0	No	None or < 30%	Normal	GC
4218	Female	57	Irradiated	No	No	0	Yes	None or < 30%	Increased	GG
4232	Female	57	Irradiated	No	No	0	No	None or < 30%	Normal	GC
4245	Female	58	Irradiated	No	No	0	No	None or < 30%	Normal	GG
4249	Female	62	Irradiated	Yes	Yes	0	Yes	None or < 30%	Normal	GC
4257	Female	67	Irradiated	Yes	No	0	Yes	None or < 30%	Increased	CC
4267	Female	57	Irradiated	Yes	No	0	No	None or < 30%	Normal	GC
4269	Female	59	Irradiated	No	No	0	Yes	None or < 30%	Normal	GG
4274	Female	61	Irradiated	Yes	No	0	No	None or < 30%	Normal	GC
4277	Female	56	Irradiated	Yes	No	0	No	None or < 30%	Normal	GG
4281	Female	67	Irradiated	Yes	No	0	Yes	None or < 30%	Normal	GG
4321	Female	63	Irradiated	Yes	No	0	Yes	None or < 30%	Normal	GG
4325	Female	64	Irradiated	No	No	0	No	None or < 30%	Normal	GC
4330	Female	67	Irradiated	Yes	Yes		Yes	None or < 30%	Normal	GC
4339	Female	61	Irradiated	No	No	0	No	None or < 30%	Normal	GG
4346	Female	63	Irradiated	Yes	Yes	0	Yes	≥ 30%	Normal	CC
4348	Female	62	Irradiated	No	No	0	No	None or < 30%	Normal	GG
4351	Female	63	Irradiated	Yes	No	0	No	None or < 30%	Normal	GC
4361	Female	62	Irradiated	Yes	No		Yes	None or < 30%	Normal	GG
4386	Female	59	Irradiated	Yes	Yes	0	Yes	None or < 30%	Normal	GG
4401	Female	56	Irradiated	No	No	0	No	None or < 30%	Normal	GC
4411	Female	65	Irradiated	Yes	Yes	0	Yes	None or < 30%	Normal	GG
4445	Female	66	Irradiated	Yes	No	0	No	None or < 30%	Normal	GC
4448	Female	64	Irradiated	Yes	No	0	Yes	None or < 30%	Normal	CC
4454	Female	67	Irradiated	No	No	5	Yes	None or < 30%	Normal	GC
4484	Female	67	Irradiated	No	Yes	0	No	None or < 30%	Normal	GG
4513	Female	61	Irradiated	No	No	40	Yes	None or < 30%	Normal	GC
4528	Female	60	Irradiated	No	No	0	No	None or < 30%	Normal	GG
4533	Female	65	Irradiated	Yes	Yes	0	No	None or < 30%	Normal	GC
4546	Female	61	Irradiated	No	No		No	None or < 30%	Normal	CC
4551	Female	60	Irradiated	Yes	Yes	0	No	None or < 30%	Normal	GG
4563	Female	59	Irradiated	No	No	0	Yes	≥ 30%	Normal	GG
4572	Female	61	Irradiated	No	No	0	No	None or < 30%	Normal	GC
4574	Female	60	Irradiated	No	No	10	Yes	None or < 30%	Normal	CC
4591	Female	65	Irradiated	No	No	0	Yes	None or < 30%	Normal	GG
4597	Female	63	Irradiated	No	No	66	Yes	None or < 30%	Normal	CC
4616	Female	57	Irradiated	No	No		No	None or < 30%	Normal	CC
4620	Female	68	Irradiated	Yes	Yes	0	Yes	≥ 30%	Increased	GG
4624	Female	58	Irradiated	No	No	0	No	None or < 30%	Normal	GC
4642	Female	65	Irradiated	No	No	0	Yes	None or < 30%	Normal	GC
4667	Female	60	Irradiated	Yes	No	0	No	None or < 30%	Normal	GC
4672	Female	67	Irradiated	No	No	0	Yes	None or < 30%	Normal	GG
4675	Female	61	Irradiated	Yes	Yes	0	No	None or < 30%	Normal	GC
4681	Female	61	Irradiated	Yes	Yes	0	Yes	None or < 30%	Normal	CC
4699	Female	71	Irradiated	Yes	Yes	0	Yes	≥ 30%	Normal	GC
4725	Female	69	Irradiated	Yes	Yes	0	No	None or < 30%	Normal	GC
4729	Female	69	Irradiated	Yes	Yes	0	Yes	None or < 30%	Normal	GC
4732	Female	59	Irradiated	Yes	Yes	0	No	None or < 30%	Normal	GC
4736	Female	62	Irradiated	Yes	No	0	No	None or < 30%	Normal	GC
4771	Female	60	Irradiated	No	No	15	No	None or < 30%	Normal	GG
4780	Female	58	Irradiated	No	No	0	No	None or < 30%	Normal	GC
4783	Female	61	Irradiated	No	No	0	Yes	None or < 30%	Normal	GG
4814	Female	69	Irradiated	No	No	0	Yes	None or < 30%	Normal	GG
4822	Female	60	Irradiated	Yes	No	0	Yes	None or < 30%	Increased	GC
4842	Female	57	Irradiated	Yes	No	10	No	None or < 30%	Normal	CC
4849	Female	69	Irradiated	No	Yes	0	No	None or < 30%	Normal	GG
4851	Female	58	Irradiated	Yes	No	16	No	None or < 30%	Normal	GC
4857	Male	63	Irradiated	Yes	No	0	No	None or < 30%	Normal	GC
4871	Male	60	Irradiated	Yes	No	30	Yes	None or < 30%	Increased	GC
4893	Male	62	Irradiated	No	No	72	No	None or < 30%	Normal	CC
4924	Male	59	Irradiated	No	Yes	0	Yes	None or < 30%	Normal	GG
4926	Male	64	Irradiated	Yes	No	20	Yes	None or < 30%	Normal	GG
4933	Male	66	Irradiated	No	No	10	No	None or < 30%	Normal	GC
4936	Female	59	Irradiated	Yes	No	0	No	None or < 30%	Normal	GG
4959	Female	62	Irradiated	Yes	No	0	Yes	None or < 30%	Normal	CC
4962	Female	64	Irradiated	No	No	0	No	None or < 30%	Normal	CC
4965	Female	66	Irradiated	Yes	No	0	No	None or < 30%	Normal	GC
4971	Female	58	Irradiated	No	No	0	No	None or < 30%	Normal	GG
4976	Male	60	Irradiated	Yes	No	90	Yes	≥ 30%	Increased	GC
4979	Female	62	Irradiated	No	No	0	No	None or < 30%	Normal	GC
4993	Female	60	Irradiated	Yes	No	0	No	None or < 30%	Normal	GC
5000	Male	65	Irradiated	Yes	No	50	Yes	≥ 30%	Increased	GG
5011	Male	54	Irradiated	Yes	No	60	No	None or < 30%	Normal	GC
5017	Female	63	Irradiated	No	Yes	0	No	None or < 30%	Normal	GC
5019	Female	61	Irradiated	No	No	0	No	None or < 30%	Normal	GG
5066	Female	64	Irradiated	Yes	Yes	0	Yes	None or < 30%	Normal	GC
5067	Male	65	Irradiated	Yes	No	10	No	None or < 30%	Increased	GC
5118	Female	64	Irradiated	No	No	0	Yes	None or < 30%	Increased	GG
5126	Female	59	Irradiated	Yes	Yes	0	No	None or < 30%	Normal	GG
5128	Female	60	Irradiated	Yes	No	0	No	None or < 30%	Normal	CC
5140	Female	65	Irradiated	Yes	Yes	0	No	None or < 30%	Normal	GG
5148	Female	60	Irradiated	Yes	No	0	No	None or < 30%	Normal	GC
5166	Female	53	Irradiated	Yes	No	0	Yes	None or < 30%	Normal	GC
5174	Female	68	Irradiated	No	No		Yes	None or < 30%	Increased	CC
5191	Male	60	Irradiated	No	No	84	No	None or < 30%	Normal	GC
5196	Male	58	Irradiated	No	Yes	0	Yes	None or < 30%	Normal	GC
5198	Male	65	Irradiated	No	No	10	Yes	None or < 30%	Increased	GC
5225	Male	74	Irradiated	Yes	No	0	Yes	None or < 30%	Normal	GC
5228	Female	65	Irradiated	Yes	Yes	0	No	None or < 30%	Normal	GC
5239	Male	65	Irradiated	No	No	0	No	None or < 30%	Normal	CC
5243	Female	64	Irradiated	Yes	Yes	0	No	None or < 30%	Normal	GG
5244	Female	64	Irradiated	No	No	0	No	None or < 30%	Normal	GG
5267	Female	60	Irradiated	Yes	No	0	Yes	None or < 30%	Normal	GC
5269	Female	63	Irradiated	Yes	No	0	Yes	None or < 30%	Normal	GC
5271	Female	62	Irradiated	No	No	0	No	None or < 30%	Normal	CC
5292	Male	61	Irradiated	Yes	No	0	No	None or < 30%	Normal	GG
5314	Male	65	Irradiated	Yes	No	70	No	None or < 30%	Normal	GC
5317	Female	60	Irradiated	No	No	0	No	None or < 30%	Normal	GG
5361	Male	65	Irradiated	Yes	No	0	Yes	None or < 30%	Increased	GC
7002	Female	59	Non-irradiated	No	No	0	No	None or < 30%	Normal	CC
7036	Male	62	Non-irradiated	Yes	No	16	No	None or < 30%	Normal	GC
7056	Male	68	Non-irradiated	Yes	No	0	Yes	None or < 30%	Increased	GC
7070	Female	66	Non-irradiated	Yes	No	0	Yes	≥ 30%	Increased	GG
7101	Female	62	Non-irradiated	Yes	No	0	No	None or < 30%	Normal	CC
7102	Male	59	Non-irradiated	No	No	40	Yes	None or < 30%	Normal	GC
7103	Male	59	Non-irradiated	Yes	Yes	75	Yes	None or < 30%	Normal	GG
7104	Male	64	Non-irradiated	Yes	Yes	30	Yes	None or < 30%	Normal	GC
7106	Female	55	Non-irradiated	Yes	No	0	No	None or < 30%	Normal	GG
7107	Male	50	Non-irradiated	Yes	No	60	No	None or < 30%	Normal	GG
7108	Male	55	Non-irradiated	No	No	0	No	None or < 30%	Normal	CC
7110	Male	73	Non-irradiated	No	No	0	No	None or < 30%	Normal	GG
7111	Female	62	Non-irradiated	No	No	0	No	None or < 30%	Normal	GG
7112	Female	57	Non-irradiated	No	No	40	Yes	≥ 30%	Normal	GC
7113	Male	59	Non-irradiated	Yes	No	36	Yes	None or < 30%	Normal	GC
7114	Female	64	Non-irradiated	Yes	No	0	Yes	None or < 30%	Normal	GC
7115	Female	60	Non-irradiated	No	No	0	No	None or < 30%	Normal	GG
7116	Male	63	Non-irradiated	Yes	No	14	Yes	≥ 30%	Normal	GC
7117	Male	63	Non-irradiated	No	No	8	Yes	None or < 30%	Normal	GC
7118	Female	62	Non-irradiated	No	No	0	No	None or < 30%	Normal	GC
7119	Female	60	Non-irradiated	Yes	No	0	No	None or < 30%	Normal	GG
7120	Female	66	Non-irradiated	Yes	Yes	0	Yes	≥ 30%	Normal	GG
7121	Male	68	Non-irradiated	No	No	50	No	None or < 30%	Normal	GC
7122	Male	67	Non-irradiated	Yes	Yes	0	No	None or < 30%	Normal	GG
7128	Female	53	Non-irradiated	No	No	0	No	None or < 30%	Normal	GC
7129	Male	64	Non-irradiated	Yes	Yes	10	No	None or < 30%	Normal	CC
7130	Male	64	Non-irradiated	No	No	20	No	None or < 30%	Normal	CC
7131	Male	56	Non-irradiated	No	No	0	No	None or < 30%	Normal	GC
7132	Female	57	Non-irradiated	No	No	0	No	None or < 30%	Normal	GC
7133	Female	67	Non-irradiated	No	No		No	None or < 30%	Normal	CC
7134	Female	67	Non-irradiated	Yes	Yes	0	No	None or < 30%	Normal	GG
7136	Female	52	Non-irradiated	No	No	0	No	None or < 30%	Normal	GG
7138	Male	74	Non-irradiated	No	No	20	No	None or < 30%	Normal	GC
7139	Male	64	Non-irradiated	No	No	0	No	None or < 30%	Normal	GG
7140	Male	64	Non-irradiated	Yes	No	0	No	None or < 30%	Normal	GC
7141	Female	61	Non-irradiated	Yes	No	0	No	None or < 30%	Normal	GG
7142	Female	54	Non-irradiated	No	No	0	No	None or < 30%	Normal	GC
7143	Female	68	Non-irradiated	Yes		0	No	None or < 30%	Normal	GC
7144	Male	59	Non-irradiated	No	No	17	Yes	≥ 30%	Increased	CC
7145	Female	54	Non-irradiated	No	No	0	No	None or < 30%	Normal	GG
7146	Male	57	Non-irradiated	No	No		No	None or < 30%	Normal	CC
7147	Female	55	Non-irradiated	No	No	0	No	None or < 30%	Normal	CC
7148	Male	62	Non-irradiated	Yes	No	60	No	None or < 30%	Normal	GC
7149	Female	51	Non-irradiated	No	No	0	No	None or < 30%	Normal	GC
7150	Female	50	Non-irradiated	No	No	15	No	None or < 30%	Normal	CC
7151	Male	61	Non-irradiated	No	No	0	No	None or < 30%	Normal	GC
7152	Female	59	Non-irradiated	No	No	0	No	None or < 30%	Normal	CC
7153	Female	59	Non-irradiated	No	No	0	No	None or < 30%	Normal	CC
7154	Female	61	Non-irradiated	No	No	0	No	None or < 30%	Normal	GG
7155	Female	69	Non-irradiated	No	No	0	Yes	None or < 30%	Increased	GG
7156	Male	70	Non-irradiated	Yes	No	0	Yes	None or < 30%	Normal	GC
7157	Male	68	Non-irradiated	Yes	No	0	No	None or < 30%	Normal	GG
7159	Male	65	Non-irradiated	No	No	48	No	None or < 30%	Normal	GC
7160	Male	65	Non-irradiated	No	No	10	No	None or < 30%	Normal	GC
7161	Female	62	Non-irradiated	No	No	0	No	None or < 30%	Normal	CC
7162	Male	68	Non-irradiated	No	No	10	No	None or < 30%	Increased	GG
7163	Male	60	Non-irradiated	No	No	10	Yes	None or < 30%	Normal	GC
7164	Female	55	Non-irradiated	No	No	0	Yes	None or < 30%	Normal	GC
7165	Female	65	Non-irradiated	No	No	0	Yes	None or < 30%	Normal	GC
7166	Female	61	Non-irradiated	Yes	No	46	No	None or < 30%	Normal	GG
7167	Female	51	Non-irradiated	No	No		Yes	None or < 30%	Normal	GC
7168	Female	55	Non-irradiated	No	No	0	No	None or < 30%	Normal	GG
7169	Male	56	Non-irradiated	No	No	0	No	None or < 30%	Normal	GC
7170	Male	67	Non-irradiated	Yes	No	70	Yes	≥ 30%	Increased	GG
7172	Female	53	Non-irradiated	No	No	27	Yes	None or < 30%	Normal	GG
7173	Male	62	Non-irradiated	No	No	0	No	None or < 30%	Normal	GC
7174	Female	65	Non-irradiated	No	No	0	No	None or < 30%	Normal	GG
7175	Male	67	Non-irradiated	No	No	8	No	None or < 30%	Normal	GG
7177	Male	59	Non-irradiated	No	No	0	No	None or < 30%	Normal	CC
7179	Female	51	Non-irradiated	No	No	0	No	None or < 30%	Normal	GC
7180	Male	64	Non-irradiated	Yes	Yes	105	Yes	None or < 30%	Normal	GG
7181	Male	54	Non-irradiated	Yes	No	0	Yes	None or < 30%	Normal	GG
7182	Male	69	Non-irradiated	Yes	No	0	No	None or < 30%	Normal	GC
7183	Female	62	Non-irradiated	No	No	0	Yes	None or < 30%	Normal	GG
7184	Male	67	Non-irradiated	Yes	Yes	100	Yes	≥ 30%	Normal	GG
7187	Male	71	Non-irradiated	Yes	No	45	No	None or < 30%	Normal	GG
7188	Female	62	Non-irradiated	No	No	0	No	None or < 30%	Normal	GG
7189	Male	61	Non-irradiated	No	No	40	No	None or < 30%	Normal	GG
7191	Female	54	Non-irradiated	No	No	0	No	None or < 30%	Normal	GC
7192	Male	65	Non-irradiated	No	No	47	Yes	None or < 30%	Normal	GG
7193	Male	59	Non-irradiated	Yes	No	35	No	None or < 30%	Increased	CC
7194	Female	59	Non-irradiated	Yes	No	0	No	None or < 30%	Normal	GG
7195	Female	59	Non-irradiated	Yes	No	0	No	None or < 30%	Normal	GC
7196	Male	62	Non-irradiated	Yes	No	10	Yes	None or < 30%	Normal	GG
7197	Female	60	Non-irradiated	Yes	Yes	0	Yes	≥ 30%	Normal	GC
7199	Female	60	Non-irradiated	Yes	No	0	No	None or < 30%	Normal	GG
7200	Male	63	Non-irradiated	Yes	No	0	Yes	None or < 30%	Increased	GG
7202	Female	61	Non-irradiated	Yes	No	0	Yes	None or < 30%	Normal	CC
7203	Female	55	Non-irradiated	No	No	0	Yes	None or < 30%	Normal	GC
7204	Female	69	Non-irradiated	Yes	No	0	Yes	None or < 30%	Normal	CC
7205	Female	46	Non-irradiated			7.5	Yes	None or < 30%	Normal	GG
7206	Male	65	Non-irradiated			0	Yes	None or < 30%	Normal	CC
7208	Female	61	Non-irradiated	Yes	No	10	Yes	None or < 30%	Normal	GG
7209	Female	56	Non-irradiated	No	No	0	No	None or < 30%	Normal	GG
7211	Male	62	Non-irradiated	No	No	105	Yes	None or < 30%	Increased	GC
7212	Female	68	Non-irradiated	Yes	No	0	Yes	None or < 30%	Normal	GC
7213	Female	62	Non-irradiated	Yes	No	0	No	None or < 30%	Normal	GC
7214	Female	57	Non-irradiated	No	No	0	No	None or < 30%	Normal	CC
7215	Female	57	Non-irradiated	Yes	No	0	No	None or < 30%	Normal	GG
7217	Female	59	Non-irradiated	Yes	No	0	Yes	None or < 30%	Normal	GG
7219	Male	66	Non-irradiated	Yes	No	14	No	None or < 30%	Normal	GG
7220	Female	63	Irradiated	Yes	No	0	Yes	None or < 30%	Normal	GG
7221	Female	66	Non-irradiated	Yes	No	0	Yes	None or < 30%	Normal	GC
7222	Male	67	Non-irradiated	No	No	60	Yes	None or < 30%	Normal	GC
7223	Female	66	Non-irradiated	No	Yes	0	No	None or < 30%	Normal	GG
7224	Female	66	Non-irradiated	No	No	0	No	None or < 30%	Normal	GC
7225	Male	65	Non-irradiated	Yes	No	1	No	None or < 30%	Normal	GG
7226	Female	64	Non-irradiated	No	No	0	No	None or < 30%	Normal	GG
7227	Male	65	Non-irradiated	Yes	No	0	Yes	None or < 30%	Normal	GG
7228	Male	61	Non-irradiated	Yes	Yes	70	Yes	None or < 30%	Increased	GG
7229	Male	73	Non-irradiated	Yes	No	20	Yes	≥ 30%	Normal	GC
7230	Male	69	Non-irradiated	No	No	0	Yes	None or < 30%	Normal	GC
7230	Male	69	Non-irradiated	Yes	No	48	Yes	≥ 30%	Normal	GC
7231	Female	73	Non-irradiated	No	No	0	No	None or < 30%	Normal	GG
7233	Male	60	Non-irradiated	No	No	0	No	None or < 30%	Normal	GG
7234	Female	55	Irradiated	Yes	Yes	0	No	None or < 30%	Normal	GC
7235	Female	61	Non-irradiated	Yes	Yes	0	Yes	None or < 30%	Normal	GC
7236	Male	76	Non-irradiated	No	Yes	0	Yes	None or < 30%	Increased	GG
7237	Male	71	Non-irradiated	Yes	No	0	Yes	≥ 30%	Normal	GC
7239	Female	57	Non-irradiated	No	No	20	No	None or < 30%	Normal	GC
7240	Female	60	Non-irradiated	No	No	0	No	None or < 30%	Normal	GC
7241	Female	69	Non-irradiated	No	No	0	Yes	None or < 30%	Increased	GG
7242	Male	67	Non-irradiated	No	Yes		No	None or < 30%	Normal	GG
7243	Male	56	Non-irradiated	No	No	0	Yes	None or < 30%	Normal	GC
7244	Female	64	Non-irradiated	No	No	0	Yes	None or < 30%	Normal	CC
7245	Female	62	Non-irradiated	No	No		Yes	None or < 30%	Normal	CC
7246	Male	61	Non-irradiated	Yes	No	0	Yes	None or < 30%	Normal	GC
7246	Female	61	Non-irradiated	Yes	No	0	Yes	None or < 30%	Normal	GG
7247	Female	57	Non-irradiated	No	No	0	No	None or < 30%	Normal	GC
7248	Male	61	Non-irradiated	No	No	20	Yes	None or < 30%	Normal	GG
7249	Male	73	Non-irradiated	Yes	Yes	40	Yes	None or < 30%	Normal	GG
7250	Female	63	Non-irradiated	Yes	No	0	No	None or < 30%	Normal	GC
7251	Female	60	Non-irradiated	No	Yes	0	No	None or < 30%	Normal	GC
7252	Male	57	Non-irradiated	No	No	90	Yes	None or < 30%	Normal	GG
7253	Female	57	Non-irradiated	Yes	No	0	No	None or < 30%	Normal	GG
7254	Male	68	Non-irradiated	No	No	30	No	None or < 30%	Normal	GC
7255	Female	64	Non-irradiated	Yes	Yes	0	Yes	None or < 30%	Normal	GC
7256	Male	65	Non-irradiated	Yes	Yes	0	No	None or < 30%	Normal	GC
7259	Female	60	Non-irradiated	Yes	No	0	No	None or < 30%	Normal	GC
7260	Female	65	Non-irradiated	Yes	Yes	20	Yes	≥ 30%	Increased	GG
7261	Male	54	Non-irradiated	Yes	No	20	No	None or < 30%	Normal	GG
7262	Male	61	Non-irradiated	Yes	No	47.5	Yes	≥ 30%	Increased	CC
7263	Male	65	Non-irradiated	Yes	No	45	No	None or < 30%	Normal	GG
7264	Female	57	Non-irradiated	No	No	0	No	None or < 30%	Normal	GG
7265	Female	56	Non-irradiated	No	No	0	No	None or < 30%	Normal	GC
7267	Female	64	Non-irradiated	Yes	No	0	No	None or < 30%	Normal	GG
7268	Male	58	Non-irradiated	No	No	50	No	None or < 30%	Normal	GC
7269	Male	62	Non-irradiated	No	No	30	No	None or < 30%	Normal	GC
7270	Female	71	Non-irradiated	No	No	0	Yes	None or < 30%	Normal	GG
7271	Male	62	Non-irradiated	No	Yes	48	Yes	None or < 30%	Increased	CC
7272	Male	64	Non-irradiated	Yes	No	0	Yes	None or < 30%	Normal	GG
7273	Male	61	Non-irradiated	Yes	No	25	Yes	None or < 30%	Normal	CC
7274	Male	70	Non-irradiated	No	No	1	No	None or < 30%	Normal	GC
7275	Male	63	Non-irradiated	No	No	0	No	None or < 30%	Normal	GC
7276	Female	64	Non-irradiated	No	No	0	No	None or < 30%	Normal	GG
7277	Female	63	Non-irradiated	Yes	No	0	No	None or < 30%	Normal	GC
7278	Female	57	Non-irradiated	No	No	0	No	None or < 30%	Normal	GG
7280	Female	60	Non-irradiated	No	No	45	Yes	None or < 30%	Normal	GG
7281	Female	61	Non-irradiated	Yes	No	0	Yes	None or < 30%	Normal	CC
7282	Female	72	Non-irradiated	No	Yes	0	No	None or < 30%	Normal	GC
7284	Male	65	Non-irradiated	Yes	No	36	No	None or < 30%	Normal	GC
7285	Female	65	Non-irradiated	No	No	0	No	None or < 30%	Normal	GC
7286	Male	64	Non-irradiated	Yes	Yes	12	Yes	None or < 30%	Normal	GC
7287	Male	61	Non-irradiated	Yes	No	5	No	None or < 30%	Normal	GG
7288	Male	64	Non-irradiated	Yes	No	0	No	None or < 30%	Normal	CC
7289	Female	64	Non-irradiated	No	No	0	No	None or < 30%	Normal	GC
7290	Male	59	Non-irradiated	Yes	No	0	Yes	None or < 30%	Normal	GC
7291	Female	65	Non-irradiated	Yes	Yes	0	Yes	≥ 30%	Normal	GG
7292	Female	60	Non-irradiated	No	No	0	No	None or < 30%	Normal	GC
7294	Male	69	Non-irradiated	Yes	No	0	Yes	None or < 30%	Normal	GG
7295	Female	67	Non-irradiated	No	No	0	No	None or < 30%	Normal	GC
7296	Male	69	Non-irradiated	Yes	No	0	No	None or < 30%	Normal	GG
7297	Male	60	Non-irradiated	No	No	0	No	None or < 30%	Normal	GG
7299	Male	77	Non-irradiated	No	No	7	No	None or < 30%	Normal	GG
7301	Female	61	Non-irradiated	Yes	No	0	Yes	None or < 30%	Normal	GG
7304	Female	59	Non-irradiated	Yes	No	0	No	None or < 30%	Normal	GC
7306	Male	74	Non-irradiated	No	Yes	0	Yes	None or < 30%	Normal	GC
7307	Male	66	Non-irradiated	Yes	No	20	Yes	None or < 30%	Normal	GG
7309	Male	74	Non-irradiated	Yes	No	80	Yes	None or < 30%	Normal	GC
7310	Male	56	Non-irradiated	No	No	30	No	None or < 30%	Normal	GC
7311	Male	73	Non-irradiated	Yes	No	0	No	None or < 30%	Normal	GG
7312	Female	64	Non-irradiated	Yes	No	0	No	None or < 30%	Normal	GC
7313	Female	68	Non-irradiated	Yes	No	0	No	None or < 30%	Normal	GC
7314	Female	59	Non-irradiated	No	No	0	No	None or < 30%	Normal	GC
7315	Female	64	Non-irradiated	No	No	0	No	None or < 30%	Normal	GG
7316	Female	66	Non-irradiated	Yes	No	0	Yes	None or < 30%	Normal	GC
7317	Male	62	Non-irradiated	No	Yes	22.5	Yes	None or < 30%	Normal	GG
7321	Male	58	Non-irradiated	No	No	8	No	None or < 30%	Normal	GC
7322	Female	58	Non-irradiated	Yes	No	0	No	None or < 30%	Normal	GC
7323	Male	64	Non-irradiated	No	No	0	No	None or < 30%	Normal	GC
7324	Female	61	Non-irradiated	No	No	0	No	None or < 30%	Normal	GC
7325	Male	67	Non-irradiated	Yes	No	25	Yes	None or < 30%	Normal	GG
7326	Male	70	Non-irradiated	Yes	No	0	No	None or < 30%	Normal	GC
7327	Female	61	Non-irradiated	No	No	15	Yes	≥ 30%	Normal	GG
7328	Female	48	Non-irradiated	No	No	0	Yes	None or < 30%	Normal	GG
7329	Female	59	Non-irradiated	No	No	0	No	None or < 30%	Normal	GG
7330	Female	65	Non-irradiated	Yes	No	0	Yes	≥ 30%	Increased	GG
7331	Male	71	Non-irradiated	Yes	No	0	Yes	None or < 30%	Normal	GC
7332	Male	69	Non-irradiated	Yes	No	30	Yes	None or < 30%	Normal	GC
7335	Female	68	Non-irradiated	Yes	No	0	No	None or < 30%	Normal	GG
7336	Female	69	Non-irradiated	No	No	0	Yes	≥ 30%	Normal	GC
7340	Female	53	Non-irradiated	No	No	0	No	None or < 30%	Normal	GG
7341	Male	63	Non-irradiated	No	No	0	No	None or < 30%	Normal	GC
7342	Male	58	Non-irradiated	No	Yes	35	Yes	None or < 30%	Increased	GC
7343	Male	63	Non-irradiated	Yes	Yes	0	Yes	None or < 30%	Increased	GG
7344	Female	59	Non-irradiated	No	No	0	No	None or < 30%	Normal	CC
7345	Female	64	Non-irradiated	Yes	Yes	0	No	None or < 30%	Normal	GC
7346	Female	64	Non-irradiated	Yes	Yes	0	No	None or < 30%	Normal	GC
7347	Male	63	Non-irradiated	No	No	7	Yes	≥ 30%	Normal	GC
7348	Female	53	Non-irradiated	No	No	45	No	None or < 30%	Normal	GC
7349	Female	54	Non-irradiated	No	No	0	No	None or < 30%	Normal	GC
7350	Female	58	Non-irradiated	No	No	0	No	None or < 30%	Normal	GC
7351	Female	58	Non-irradiated	Yes	No	40	Yes	None or < 30%	Increased	GC
7352	Female	64	Non-irradiated	Yes	Yes	0	Yes	≥ 30%	Increased	GG
7353	Male	68	Non-irradiated	Yes	No	0	Yes	None or < 30%	Normal	GC
7354	Female	54	Non-irradiated	Yes	No	5	Yes	≥ 30%	Normal	GG
7355	Female	63	Non-irradiated	Yes	Yes	0	No	None or < 30%	Normal	GC
7356	Female	55	Non-irradiated	No	No	22	No	None or < 30%	Normal	GC
7357	Female	67	Non-irradiated	Yes	Yes	0	Yes	None or < 30%	Increased	GG
7359	Female	63	Non-irradiated	Yes	Yes	0	Yes	None or < 30%	Normal	CC
7360	Female	65	Non-irradiated	Yes	No	0	Yes	≥ 30%	Normal	GC
7361	Female	59	Non-irradiated	Yes	No	0	No	None or < 30%	Normal	GG
7362	Female	54	Non-irradiated	No	No	0	Yes	None or < 30%	Normal	GG
7363	Female	61	Non-irradiated	No	No	24	Yes	None or < 30%	Normal	CC
